# Supplementary material for: Cross-linked, porous imidazolium-based poly(ionic liquid)s for CO2 capture and utilisation
Source: Royal Society of Chemistry journal article supplement (doi:10.1039/d1nj02946k), 2021-01-01
Supplement: d1nj02946k1.pdf [file d1nj02946k1.pdf]

# Cross-linked, Porous Imidazolium-based Poly(Ionic Liquid)s for CO<sub>2</sub> Capture and Utilisation

*Ala'a F. Eftaiha,<sup>\*a</sup> Abdussalam K. Qaroush,<sup>\*b</sup> Areej K. Hasan,<sup>b</sup> Khaleel I. Assaf,<sup>c</sup> Feda'a M. Al-Qaisi,<sup>a</sup> Maryam E. Melhem,<sup>b</sup> Bassem A. Al-Maythalony,<sup>d,e</sup> Muhammad Usman<sup>f</sup>*

<sup>a</sup> Department of Chemistry, Faculty of Science, The Hashemite University, P.O. Box 330127, Zarqa 13133, Jordan. E-mail: [alaa.eftaiha@hu.edu.jo](mailto:alaa.eftaiha@hu.edu.jo)

<sup>b</sup> Department of Chemistry, Faculty of Science, The University of Jordan, Amman 11942, Jordan. E-mail: [a.qaroush@ju.edu.jo](mailto:a.qaroush@ju.edu.jo)

<sup>c</sup> Department of Chemistry, Faculty of Science, Al-Balqa Applied University, Al-Salt 19117, Jordan.

<sup>d</sup> Materials Discovery Research Unit, Advanced Research Centre, Royal Scientific Society, Amman 11941, Jordan.

<sup>e</sup> Technology Innovation Center on Carbon Capture and Sequestration (TIC-CCS), King Fahd University of Petroleum and Minerals (KFUPM), Dhahran, 31261, Saudi Arabia.

<sup>f</sup> Center of Research Excellence in Nanotechnology (CENT), King Fahd University of Petroleum and Minerals (KFUPM), Dhahran 31261, Saudi Arabia.

## Electronic Supplementary Information (ESI)

|                                                                                                                                                                                                                                                                                                    |    |
|----------------------------------------------------------------------------------------------------------------------------------------------------------------------------------------------------------------------------------------------------------------------------------------------------|----|
| <b>Table S1.</b> CO <sub>2</sub> sorption performance of imidazolium based PILs.....                                                                                                                                                                                                               | 3  |
| <b>Table S2.</b> The synthesised monomeric analogues and <i>homo</i> -/ <i>co</i> -polymers yields.....                                                                                                                                                                                            | 11 |
| <b>Table S3.</b> Specific surface area measurements for the synthesised PILs by multi-point BET.....                                                                                                                                                                                               | 21 |
| <b>Table S4.</b> CO <sub>2</sub> capture efficiency data for vinylimidazolium-based PILs.....                                                                                                                                                                                                      | 22 |
| <b>Table S5.</b> Frontier-orbital contour plots for the optimised geometries (at B3LYP/6-31G* level of theory) for the monomeric reactants, and the HOMO-LUMO energy gaps.....                                                                                                                     | 22 |
| <b>Table S6.</b> Catalytic performance of various PILs for the cycloaddition of CO <sub>2</sub> versus PO, ECH and SO.....                                                                                                                                                                         | 23 |
| <b>Figure S1.</b> <sup>1</sup> H NMR spectrum of <b>3</b> in DMSO- <i>d</i> <sub>6</sub> ; <b>S</b> : Solvent; <b>x</b> : H <sub>2</sub> O.....                                                                                                                                                    | 12 |
| <b>Figure S2.</b> <sup>13</sup> C NMR spectrum of <b>3</b> in DMSO- <i>d</i> <sub>6</sub> ; <b>S</b> : Solvent.....                                                                                                                                                                                | 13 |
| <b>Figure S3.</b> ATR-FTIR spectra of 1-vinylimidazole ( <b>1</b> , blue trace), N-(3-bromopropyl)phthalimide ( <b>2</b> , red trace) and the IL precursor ( <b>3</b> , black trace).....                                                                                                          | 14 |
| <b>Figure S4.</b> <sup>1</sup> H NMR spectrum of <b>6</b> in DMSO- <i>d</i> <sub>6</sub> ; <b>S</b> : Solvent; <b>x</b> : H <sub>2</sub> O.....                                                                                                                                                    | 15 |
| <b>Figure S5.</b> <sup>13</sup> C NMR spectrum of <b>6</b> in DMSO- <i>d</i> <sub>6</sub> ; <b>S</b> : Solvent.....                                                                                                                                                                                | 16 |
| <b>Figure S6.</b> ATR-FTIR spectra of allyl chloride ( <b>4</b> , blue trace), potassium phthalimide ( <b>5</b> , red trace) and <b>6</b> (black trace).....                                                                                                                                       | 17 |
| <b>Figure S7.</b> ATR-FTIR spectra of <b>3</b> (blue trace), <b>6</b> (red trace), <i>co</i> -PIL-x1 ( <b>7</b> , black trace), <i>co</i> -PIL-x2 ( <b>8</b> , pink trace) and <i>co</i> -PIL-x4 ( <b>9</b> , violet trace).....                                                                   | 18 |
| <b>Figure S8.</b> ATR-FTIR spectra of <b>3</b> (black trace) and <i>homo</i> -PIL-x1 ( <b>13</b> , red trace).....                                                                                                                                                                                 | 19 |
| <b>Figure S9.</b> ATR-FTIR spectra of <b>6</b> (black trace) and <i>homo</i> -PAP ( <b>17</b> , red trace).....                                                                                                                                                                                    | 20 |
| <b>Figure S10.</b> ATR-FTIR spectra of the prepared <i>co</i> -PILs: <i>co</i> -PIL-x2 ( <b>8</b> , black trace), <i>co</i> -PIL-NH <sub>2</sub> -x2 ( <b>11</b> , red trace), <i>co</i> -PIL-x4 ( <b>9</b> , blue trace) and <i>co</i> -PIL-NH <sub>2</sub> -x4 ( <b>12</b> , magenta trace)..... | 21 |
| <b>Figure S11.</b> CO <sub>2</sub> sorption isotherms of the synthesised polymers ( <b>10</b> , <b>13</b> , <b>16-18</b> ) at 298 K. Filled and unfilled symbols show gas adsorption and desorption patterns, respectively.....                                                                    | 22 |
| <b>Figure S12.</b> Calculated HOMO-LUMO gaps for the starting materials (at B3LYP/6-31G* in gas phase using Gaussian 09 program).....                                                                                                                                                              | 26 |
| <b>Figure S13.</b> The <sup>1</sup> H NMR spectra of the ECH with 0% conversion of its corresponding CC in DMSO- <i>d</i> <sub>6</sub> ; <b>S</b> : Solvent; <b>x</b> : H <sub>2</sub> O, catalyzed by poly(DVB) (Entry 1, Table 2).....                                                           | 26 |
| <b>Figure S14.</b> The <sup>1</sup> H NMR spectrum of epichlorohydrin carbonate in DMSO- <i>d</i> <sub>6</sub> ; <b>S</b> : Solvent; <b>x</b> : H <sub>2</sub> O, catalyzed by <i>co</i> -PIL-x1 at 5 h with a conversion of 11% (Entry 2, Table 2).....                                           | 27 |
| <b>Figure S15.</b> The <sup>1</sup> H NMR spectrum of epichlorohydrin carbonate in DMSO- <i>d</i> <sub>6</sub> ; <b>S</b> : Solvent; <b>x</b> : H <sub>2</sub> O catalyzed by <i>co</i> -PIL-x2 at 5 h with a conversion of 15%. (Entry 3, Table 2).....                                           | 28 |
| <b>Figure S16.</b> The <sup>1</sup> H NMR spectra of epichlorohydrin carbonate in DMSO- <i>d</i> <sub>6</sub> ; <b>S</b> : Solvent; <b>x</b> : H <sub>2</sub> O catalyzed by <i>co</i> -PIL-x4 at 5 h with a conversion of 57% (Entry 4, Table 2).....                                             | 29 |
| <b>Figure S17.</b> The <sup>1</sup> H NMR spectrum of epichlorohydrin carbonate in DMSO- <i>d</i> <sub>6</sub> ; <b>S</b> : Solvent; <b>x</b> : H <sub>2</sub> O catalyzed by <i>homo</i> -PIL-x1 at 5 h with a conversion of 16% (Entry 5, Table 2).....                                          | 30 |
| <b>Figure S18.</b> The <sup>1</sup> H NMR spectrum of epichlorohydrin carbonate in DMSO- <i>d</i> <sub>6</sub> ; <b>S</b> : Solvent; <b>x</b> : H <sub>2</sub> O catalyzed by <i>homo</i> -PIL-x2 at 5 h with a conversion of 33% (Entry 6, Table 2).....                                          | 31 |
| <b>Figure S19.</b> The <sup>1</sup> H NMR spectrum of epichlorohydrin carbonate in DMSO- <i>d</i> <sub>6</sub> ; <b>S</b> : Solvent; <b>x</b> : H <sub>2</sub> O catalyzed by <i>homo</i> -PIL-x4 at 5 h with a conversion of 73% (Entry 6, Table 2).....                                          | 32 |
| <b>Figure S20.</b> The <sup>1</sup> H NMR spectrum of the epichlorohydrin carbonate in DMSO- <i>d</i> <sub>6</sub> ; <b>S</b> : Solvent; <b>x</b> : H <sub>2</sub> O catalyzed by <i>homo</i> -PIL-x4 at 24 h with a conversion of 93% (Entry 8, Table 2).....                                     | 33 |

|                                                                                                                                                                                                                                                                                                 |    |
|-------------------------------------------------------------------------------------------------------------------------------------------------------------------------------------------------------------------------------------------------------------------------------------------------|----|
| <b>Figure S21.</b> The $^1\text{H}$ NMR spectrum of the epichlorohydrin carbonate in $\text{DMSO-}d_6$ ; <b>S:</b> Solvent; <b>x:</b> $\text{H}_2\text{O}$ catalyzed by <i>homo</i> -PIL-x4 at 48 h with a full conversion (Entry 9, Table 2). .....                                            | 34 |
| <b>Figure S22.</b> The $^1\text{H}$ NMR spectrum of the epichlorohydrin carbonate in $\text{DMSO-}d_6$ ; <b>S:</b> Solvent; <b>x:</b> $\text{H}_2\text{O}$ catalyzed by <i>homo</i> -PIL-x4 at $P_{\text{CO}_2}$ (1 atm)/ T (20 °C) for 72 h with a conversion of 16% (Entry 10, Table 2).....  | 35 |
| <b>Figure S23.</b> The $^1\text{H}$ NMR spectrum of the epichlorohydrin carbonate in $\text{DMSO-}d_6$ ; <b>S:</b> Solvent; <b>x:</b> $\text{H}_2\text{O}$ catalyzed by <i>homo</i> -PIL-x4 at $P_{\text{CO}_2}$ (1 bar)/ T (110 °C) for 72 h with a conversion of 60% (Entry 11, Table 2)..... | 36 |
| <b>Figure S24.</b> The $^1\text{H}$ NMR spectrum of the propylene carbonate in $\text{DMSO-}d_6$ ; <b>S:</b> Solvent; <b>x:</b> $\text{H}_2\text{O}$ catalyzed by <i>homo</i> -PIL-x4 at 24 h with a conversion of 99% (Entry 1, Table3. ....                                                   | 37 |
| <b>Figure S25.</b> The $^1\text{H}$ NMR spectrum of the epichlorohydrin carbonate in $\text{DMSO-}d_6$ ; <b>S:</b> Solvent; <b>x:</b> $\text{H}_2\text{O}$ , catalyzed by <i>homo</i> -PIL-x4 at 24 h with a conversion of 92 % (Entry 2, Table 3). ....                                        | 38 |
| <b>Figure S26.</b> The $^1\text{H}$ NMR spectrum of the epibromohydrin carbonate in $\text{DMSO-}d_6$ ; <b>S:</b> Solvent; <b>x:</b> $\text{H}_2\text{O}$ catalyzed by <i>homo</i> -PIL-x4 at $P_{\text{CO}_2}$ (1 bar)/ T (110 °C) for 24 h with a conversion of 91% (Entry 3, Table 3).....   | 39 |
| <b>Figure S27.</b> The $^1\text{H}$ NMR spectrum of the styrene carbonate in $\text{DMSO-}d_6$ ; <b>S:</b> Solvent; <b>x:</b> $\text{H}_2\text{O}$ catalyzed by <i>homo</i> -PIL-x4 at 5h with a conversion 56% (Entry 4, Table 3). ....                                                        | 40 |
| <b>Figure S28.</b> The $^1\text{H}$ NMR spectrum of the crude reaction in $\text{DMSO-}d_6$ ; <b>S:</b> Solvent; <b>x:</b> $\text{H}_2\text{O}$ , catalyzed by <i>homo</i> -PIL-x4 at 24 h (Entry 5, Table 3). ....                                                                             | 41 |
| <b>Figure S29.</b> ATR-FTIR spectra of the propylene oxide (black trace) and propylene carbonate (red trace) (Entry 1, Table 3). ....                                                                                                                                                           | 42 |
| <b>Figure S30.</b> ATR-FTIR spectra of the epichlorohydrin (black trace) and epichlorohydrin carbonate (red trace) (Entry 2, Table 3). ....                                                                                                                                                     | 43 |
| <b>Figure S31.</b> ATR-FTIR spectra of the epibromohydrin (black trace) and epibromohydrin carbonate (red trace) (Entry 3, Table 3). ....                                                                                                                                                       | 44 |
| <b>Figure S32.</b> ATR-FTIR spectra of the styrene oxide (black trace) and styrene carbonate (red trace), (Entry 4, Table 3). ....                                                                                                                                                              | 45 |
| <b>Figure S33.</b> The $^1\text{H}$ NMR spectrum of epichlorohydrin carbonate product in $\text{DMSO-}d_6$ ; <b>S:</b> Solvent; <b>x:</b> $\text{H}_2\text{O}$ , catalyzed by <i>homo</i> -PIL-x4 at 5 h with a conversion of 73%, first run. ....                                              | 46 |
| <b>Figure S34.</b> The $^1\text{H}$ NMR spectrum of epichlorohydrin carbonate product in $\text{DMSO-}d_6$ ; <b>S:</b> Solvent; <b>x:</b> $\text{H}_2\text{O}$ , catalyzed by <i>homo</i> -PIL-x4 at 5 h with a conversion of 66%, second run. ....                                             | 47 |
| <b>Figure S35.</b> The $^1\text{H}$ NMR spectrum of epichlorohydrin carbonate product in $\text{DMSO-}d_6$ ; <b>S:</b> Solvent; <b>x:</b> $\text{H}_2\text{O}$ , catalyzed by <i>homo</i> -PIL-x4 at 5 h with a conversion of 65%, third run.....                                               | 48 |
| <b>Figure S36.</b> The $^1\text{H}$ NMR spectrum of epichlorohydrin carbonate product in $\text{DMSO-}d_6$ ; <b>S:</b> Solvent; <b>x:</b> $\text{H}_2\text{O}$ , catalyzed by <i>homo</i> -PIL-x4 at 5 h with a conversion of 70%, fourth run.....                                              | 49 |
| <b>Figure S37.</b> The $^1\text{H}$ NMR spectrum of epichlorohydrin carbonate product in $\text{DMSO-}d_6$ ; <b>S:</b> Solvent; <b>x:</b> $\text{H}_2\text{O}$ , catalyzed by <i>homo</i> -PIL-x4 at 5 h with a conversion of 62%, fifth run. ....                                              | 50 |

**Table S1.** CO<sub>2</sub> sorption performance of imidazolium based PILs.

| PILs                                                                                     | Acronym                 | Sorption Conditions<br><i>T</i> (K)/ <i>P</i> (bar) | CO <sub>2</sub> Uptake <sup>a</sup> | Ref |
|------------------------------------------------------------------------------------------|-------------------------|-----------------------------------------------------|-------------------------------------|-----|
| 3-(4-vinylbenzyl)-1-vinylimidazolium bis(trifluoro methylsulfonyl)- imide                | VBIIm-IL                | 273 /1                                              | 0.02                                | 1   |
| <i>m</i> -poly-3-(4-vinylbenzyl)-1-vinylimidazolium bis(trifluoro methylsulfonyl)- imide | <i>m</i> -PIL           | 273 /1                                              | 0.46                                | 1   |
| <i>m</i> -poly(3-N-hexyl-1-vinylimidazolium bromide)                                     | <i>co</i> -PVI-C6       | 295 /1                                              | 0.18                                | 2   |
| Poly(N-vinylimidazole bromide)                                                           | PVEIm[Br]               | 295 /1                                              | 0.09                                | 3   |
| Poly(N-vinylimidazole tetrafluoroborate)                                                 | PVEIm[BF <sub>4</sub> ] | 295 /1                                              | 0.12                                | 3   |
| Poly(N-vinylimidazole hexafluorophosphate)                                               | PVEIm[PF <sub>6</sub> ] | 295 /1                                              | 0.13                                | 3   |
| Urea-functionalised imidazolium-based ionic polymer                                      | UIIP                    | 273                                                 | 0.418                               | 4   |
| Click-based porous organic polymer bearing imidazolium IL                                | CPP-ILs                 | 273/1                                               | 2.13                                | 5   |
| Poly(1,2,3,4,5,6-hexakis (methyl) benzene vinylimidazolium bromide)                      | PVImBr-6-SCD            | 273 /1                                              | 3.60                                | 6   |
| 2-Phenylimidazolium based porous hyper crosslinked ionic Polymers                        | HIP-Br-2                | 273/1                                               | 2.9                                 | 7   |
|                                                                                          | HIP-Cl-1                |                                                     | 3.8                                 |     |

<sup>a</sup> The unit of CO<sub>2</sub> uptake is “mmol CO<sub>2</sub>/g sorbent”

## 1. Synthesis of Monomers

### 1.1. Synthesis of 3-(3-(phthalimide)propyl)-1-vinylimidazolium bromide (**3**)

1-vinylimidazole, (**1**, 1.04 g, 0.011 mol) was added to a solution of N-(3-bromopropyl)phthalimide, (**2**, 3.50 g, 0.011 mol) in 10 mL toluene and heated up to (70-75) °C with continuous stirring for 24 h (**Scheme 1**). The white precipitate (**3**) was filtered and washed with 4 × 20 mL DCM portions, and then dried in a vacuum for 4 h. The obtained yield was 85%. <sup>1</sup>H NMR (400 MHz, DMSO) δ 9.58 (s, 1H), 8.25 (s, 1H), 7.96 (s, 1H), 7.86 (s, 4H), 7.33 (dd, 1H), 5.98 (d, *J* = 15.6 Hz, 1H), 5.42 (d, *J* = 8.0 Hz, 1H), 4.28 (t, 2H), 3.63 (t, 2H), 2.21 (q, 2H). <sup>13</sup>C NMR (101 MHz, DMSO) δ 168.03, 135.55, 134.42, 131.67, 128.85, 123.17, 123.03, 119.15, 108.70, 46.94, 39.52, 34.30, 28.35. EA, Calculated: C: 53.05; H:

4.45 and N: 11.60. Found: C: 53.90; H: 5.31 and N: 11.59. ATR-FTIR (500-4000)  $\text{cm}^{-1}$  range, 1765 ( $\text{C}=\text{O}_{\text{asym}}$ ), 1710 ( $\text{C}=\text{O}_{\text{sym}}$ ), 1649 ( $\text{C}=\text{C}_{\text{vinyl}}$ ), 1618 ( $\text{C}=\text{C}_{\text{Ar}}$ ), 1572, 1553 ( $\text{C}=\text{N}^+$ ), 532 ( $\text{C}-\text{Br}$ ). m.p.: 190 °C.

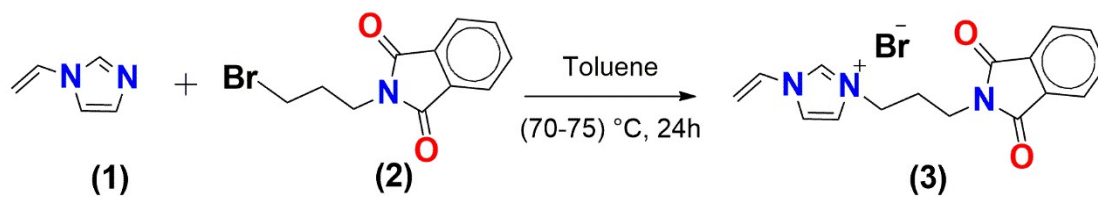

**Scheme S1.** The synthetic route of imidazolium-based monomer (3)

## 1.2.Synthesis of N-allylphthalimide (**6**)

The N-allylphthalimide was synthesised as previously reported <sup>8</sup>. Allyl chloride (**4**, 2.0 mL, 0.025 mol) was added to a mixture of potassium phthalimide (**5**, 5.0 g, 0.027 mol) and TBAB (1.0 g, 0.003 mol) in 17 mL DMF (**Scheme 2**). The reaction mixture was heated up to 55 °C for 24h. Later, a yellow oily layer was washed with deionized water to get rid of any unreacted starting materials. The white solid product **6** was dried in a vacuum oven for 4 h. The separated yield was 76%. <sup>1</sup>H NMR (500 MHz, DMSO)  $\delta$  7.84 (m, 4H), 5.88 (m, 1H), 5.13 (s, 1H), 5.10 (d,  $J = 5.8$  Hz, 1H), 4.17 (d, 2H). <sup>13</sup>C NMR (126 MHz, DMSO)  $\delta$  167.45, 134.43, 132.39, 131.54, 123.07, 116.31. EA Calculated: C: 70.58; H: 4.85 and N: 7.48. Found, C: 70.64; H: 5.61 and N: 7.43. ATR-FTIR (500-4000)  $\text{cm}^{-1}$  range, 1770 (C=O<sub>asym</sub>), 1690 (C=O<sub>sym</sub>), 1645 (C=C<sub>allyl</sub>), 1620 (C=C<sub>Ar</sub>). m.p.: 76 °C.

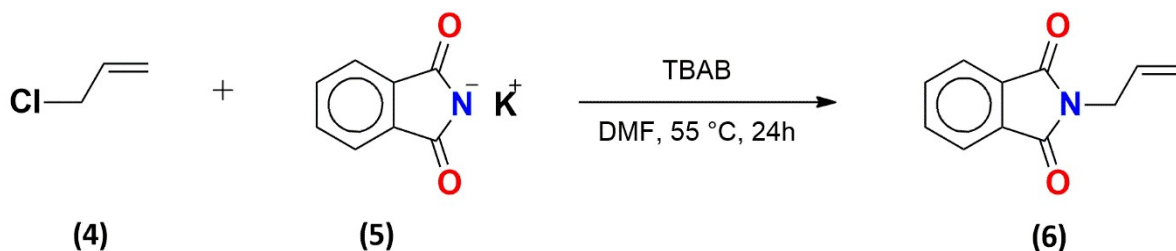

**Scheme S2.** Synthesis of N-allylphthalimide (**6**)

## 2. Synthesis of Copolymers

### 2.1.Synthesis of *co*-poly(3-(3-(phthalimide) propyl)-1-vinylimidazolium bromide)(N-allylphthalimide), (*co*-PIL-x1, **7**)

The *co*-PIL-x1 (**7**) was prepared *via* free radical polymerisation of the synthesised IL precursor and N-allylphthalimide using DVB as a crosslinker and AIBN as an initiator (**Scheme 3**). A mixture of **3** (0.36 g, 0.001 mol) and **6** (0.19 g, 0.001 mol) were added to a solution of DVB (2 mL, 0.014 mol) in 17 mL DMSO. The solution was sonicated at 40°C for 1h. Consequently, a solution of the initiator, (0.2 M of an AIBN in 1 ml of toluene; 0.007

mol) was added to the reaction mixture under N<sub>2</sub>, and then the reaction was heated up to 70°C for 24 h. A white fine powder was collected, soaked and washed with DCM and finally dried in the oven. The isolated yield was 50%.

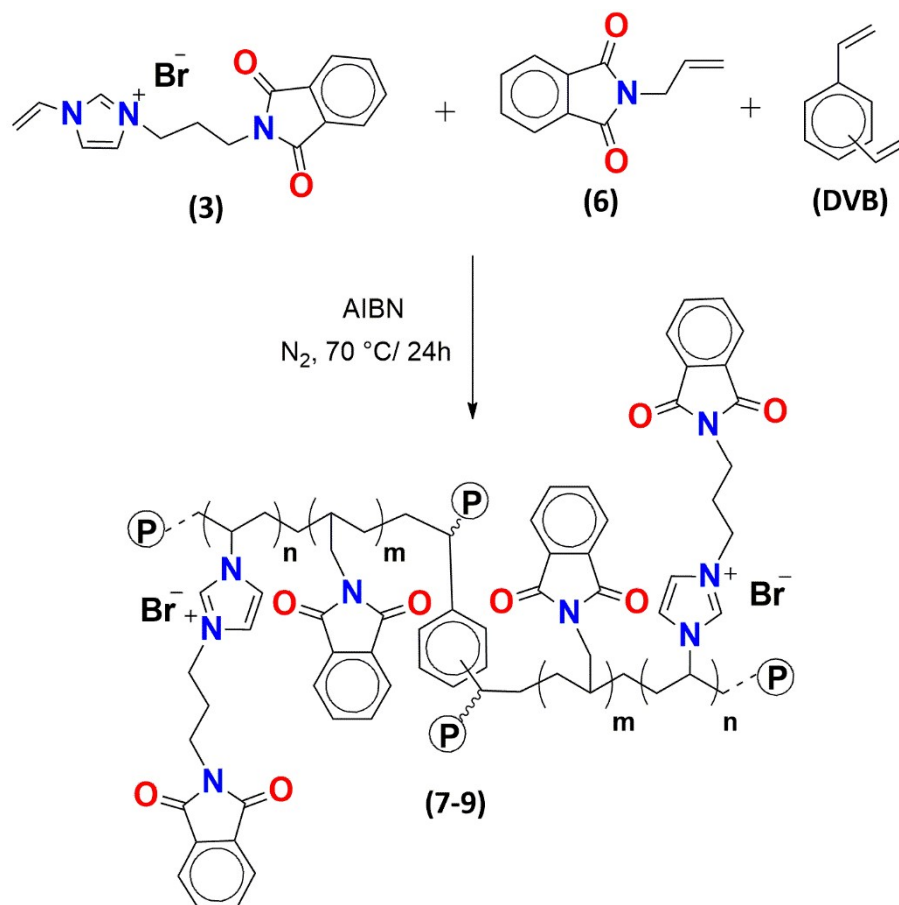

**Scheme S3.** Synthesis of *co*-PIL-*xy* (*y*: 1, 2 or 4, 7-9) as a result of random polymerisation of **3** and **6** and simultaneous crosslinking using DVB.

### 2.2. Synthesis of *co*-PIL-x2 (**8**) and *co*-PIL-x4 (**9**)

The synthetic protocols of *co*-PIL-x2 (**8**) and *co*-PIL-x4 (**9**), were done by following the previous *co*-PIL-x1 (**7**) synthesis procedure; employing different molar ratio of the monomers which was doubled in **8** and quadruple in **9**. Consequently, a (**3**, 0.72 g, 0.002 mol) and (**6**, 0.38 g, 0.002 mol) for **8**, while (**3**, 1.44 g, 0.004 mol) and (**6**, 0.76 g, 0.004 mol) for **9**. The percentage yields were 64 and 89%, respectively.

2.3. Synthesis of *co*-poly(3-(3-(propylamine)-1-vinyl-imidazol-3-ium bromide)(N-allylamine) (*co*-PIL-NH<sub>2</sub>-xy, **10-12**; y = 1, 2, 4)

Hydrazinolysis of **7-9** into their corresponding amines (**10-12**) was achieved upon mixing 1 g of the *co*-PILs with hydrazine hydrate (4 mL, 0.625 mol) in 15 mL ethanol. The mixture was refluxed for 24 h at 90 °C. The solid polymers were washed several times with DMSO to get rid of any phthalhydrazide traces, then washed excessively with ethanol and dried in the oven for 4 h. The yields for **10-12** were 62, 86 and 60%, respectively.

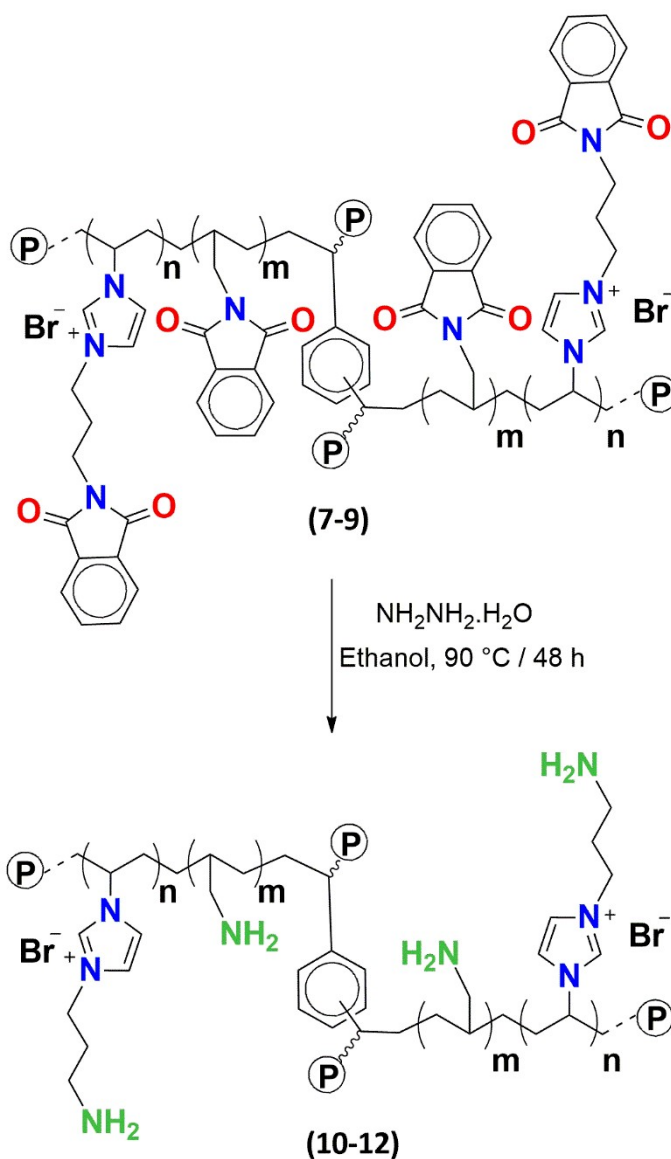

**Scheme S4.** Hydrazinolysis of the proposed formula of the phthalimide-based PILs (**7-9**) to yield the amine-functionalised *co*-PILs (**10-12**)



### 3. Synthesis of Homopolymers

#### 3.1. Synthesis of *homo*-poly(3-(3-(phthalimide) propyl)-1-vinylimidazolium bromide), (*homo*-PIL-x1, **13**)

The *homo*-PIL-x1 (**13**) was synthesised by dissolved and sonicated the IL precursor (**3**, 0.36 g, 0.001 mol) in 15 mL of DMSO with DVB (1 mL, 0.007 mol) at 40 °C for 1h. While the solution was kept under N<sub>2</sub>, 0.2 M AIBN solution in toluene (1 mL, 0.007 mol) was added to the reaction mixture, and then refluxed up to 70 °C for 24 h (**Scheme S5A**). A very fine powder was collected, soaked and washed with DCM and dried in the oven. The percentage yield was 60%.

#### 3.2. Synthesis of *homo*-PIL-x2 (**14**) and *homo*-PIL-x4 (**15**)

The *homo*-PIL-x2 (**14**) and *homo*-PIL-x4 (**15**) were synthesised by a similar procedure to that of *homo*-PIL-x1 (**13**). Thus, the IL precursor (**3**, 0.72 g, 0.002 mol) was needed to prepare **14**, while the **15** was synthesised from (**3**, 1.44 g, 0.004 mol) as shown in **Scheme 5A**. The fine powders (**14** and **15**) were collected, soaked and washed by DCM and dried in the oven. The yields for **14** and **15** were 74 and 66%, respectively.

#### 3.3. Synthesis of *homo*-poly(N-allylphthalimide), (*homo*-PAP, **17**)

*homo*-PAP (**17**) was synthesised by dissolving N-allylphthalimide (**6**, 0.19 g, 0.001 mol) in 15.0 mL DMSO mixed with DVB (1.0 mL, 0.007 mol) and sonicated at 40 °C for 1h. Afterwards, 0.2 M AIBN solution in toluene (1 mL, 0.007 mol) was added to the reaction mixture under N<sub>2</sub> and then refluxed for 24 h at 70 °C (**Scheme 5B**). The consequential the fine powder was collected, soaked and washed with DCM and dried in the oven for 4 h. The percentage yield was 57%.

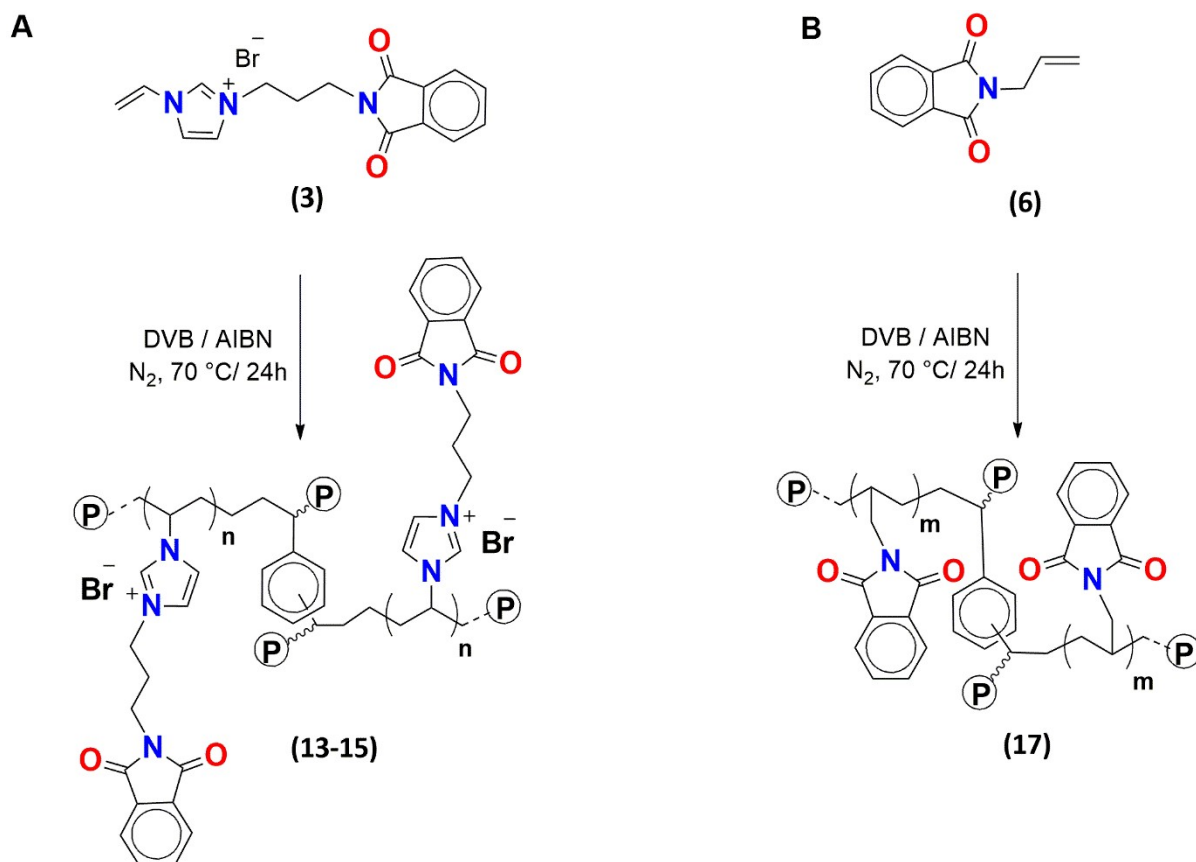

**4. Synthesis of Amine-Terminated *homo*-polymers**

4.1. Synthesis of poly(3-(3-(propylamine)-vinylimidazolium bromide); *homo*-PIL-NH<sub>2</sub>-x1 (**16**):

The mixture of *homo*-PIL-NH<sub>2</sub>-x1 (**13**, 1.0 g) and NH<sub>2</sub>NH<sub>2</sub>•H<sub>2</sub>O (4 mL, 0.019 mol) in 15 mL ethanol was refluxed at 90 °C for 48 h (**Scheme 6A**). The solid was collected, washed several times with abundant amounts of DMSO/ethanol to get rid of any by-products and dried in oven. The yield was 68%.

4.2. Synthesis of *homo*-poly(N-allylamine) (*homo*-PAA, **18**):

A mixture of *homo*-PAP (**17**, 1.0 g) and an excess amount of NH<sub>2</sub>NH<sub>2</sub>•H<sub>2</sub>O (4 mL, 0.019 mol) in 15 mL ethanol was refluxed at 90 °C for 48 h (**Scheme 6B**). Afterwards, the solid

was collected, washed with copious amount of DMSO/ethanol several times and dried in oven. The yield was 74%.

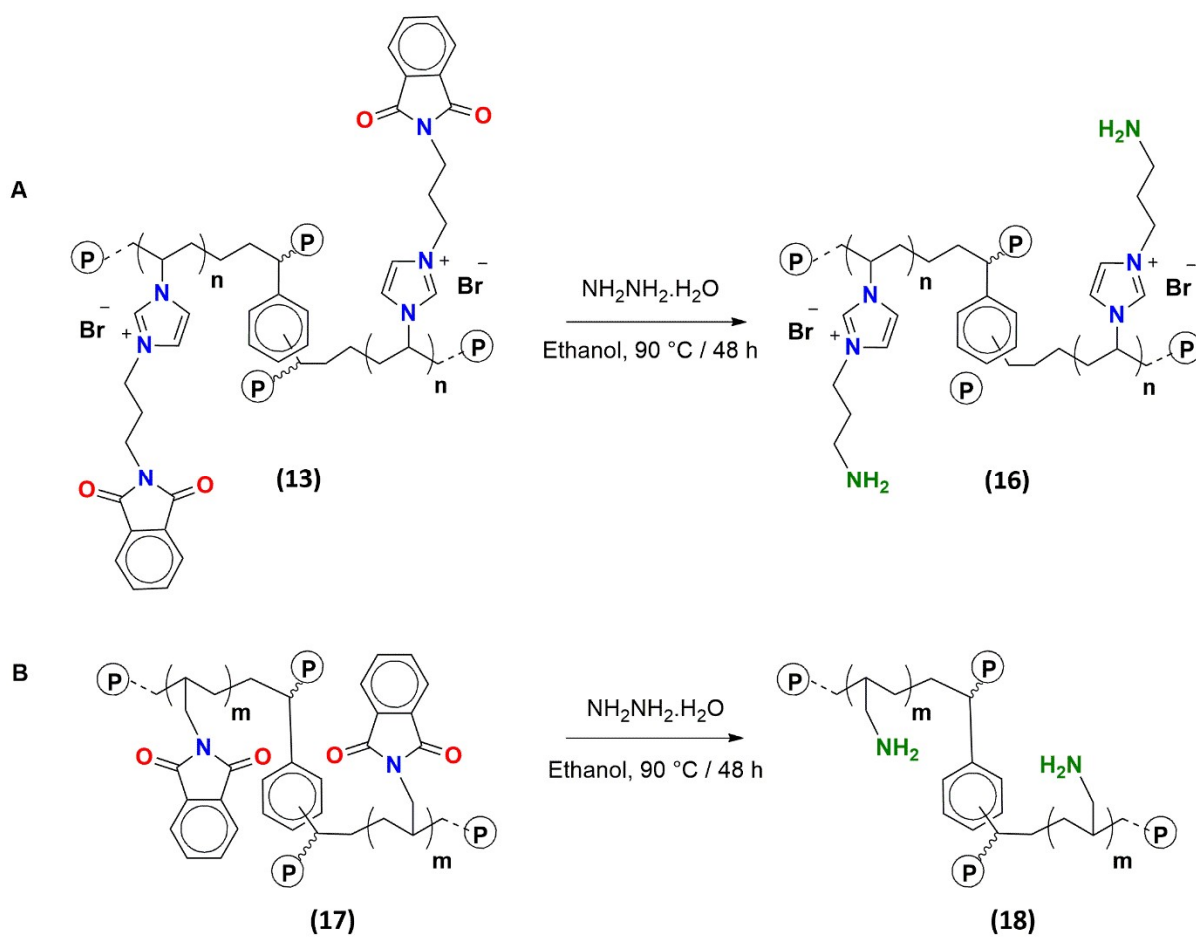

**Scheme S6.** Synthesis of *homo*-PIL-NH<sub>2</sub>-x1 (**16**) and *homo*-PAA (**18**)

**Table S2.** The synthesised monomeric analogues and *homo*-/*co*-polymers yields.

| Samples                              | Code      | Yields % |
|--------------------------------------|-----------|----------|
| 1-Vinylimidazole                     | <b>1</b>  | -        |
| N-(3-bromopropyl)phthalimide         | <b>2</b>  | -        |
| IL precursor                         | <b>3</b>  | 85       |
| Allyl chloride                       | <b>4</b>  | -        |
| Potassium phthalimide                | <b>5</b>  | -        |
| N-allylphthalimide                   | <b>6</b>  | 76       |
| <i>co</i> -PIL-x1                    | <b>7</b>  | 50       |
| <i>co</i> -PIL-x2                    | <b>8</b>  | 64       |
| <i>co</i> -PIL-x4                    | <b>9</b>  | 89       |
| <i>co</i> -PIL-NH <sub>2</sub> -x1   | <b>10</b> | 62       |
| <i>co</i> -PIL-NH <sub>2</sub> -x2   | <b>11</b> | 86       |
| <i>co</i> -PIL-NH <sub>2</sub> -x4   | <b>12</b> | 60       |
| <i>homo</i> -PIL-x1                  | <b>13</b> | 60       |
| <i>homo</i> -PIL-x2                  | <b>14</b> | 74       |
| <i>homo</i> -PIL-x4                  | <b>15</b> | 66       |
| <i>homo</i> -PIL-NH <sub>2</sub> -x1 | <b>16</b> | 68       |
| <i>homo</i> -PAP                     | <b>17</b> | 57       |
| <i>homo</i> -PAA                     | <b>18</b> | 74       |

## 5. Materials' Characterisation

### 5.1. Characterisation of 3-(3-(phthalimide)propyl)-1-vinylimidazol-3-ium bromide (**3**)

The <sup>1</sup>H NMR spectrum of **3** is shown in **Figure S1**. The most down-fielded singlet peak at 9.58 ppm (**a**) corresponding to the hydrogen on the imidazolium head which verified the quaternarisation process.<sup>9</sup> The two singlet peaks observed at 8.25 and 7.96 ppm were ascribed to the hydrogens **b** and **c**, respectively.<sup>6</sup> While, the aromatic hydrogens of the phenyl ring in the phthalimide bulk were observed as a singlet peak at 7.86 ppm (**d**). Furthermore, a doublet of doublet peak at 7.34 ppm corresponding to the vinylic hydrogen (**e**) was attained.<sup>10</sup> Two more doublet peaks were observed at 5.98 and 5.42 ppm and assigned to the terminal vinylic hydrogens (**f**).<sup>9</sup> The methylene hydrogens (**g**, **h** and **i**) can be distinguished as two triplets at 4.28, 3.63, and a quintet at 2.21 ppm, respectively.

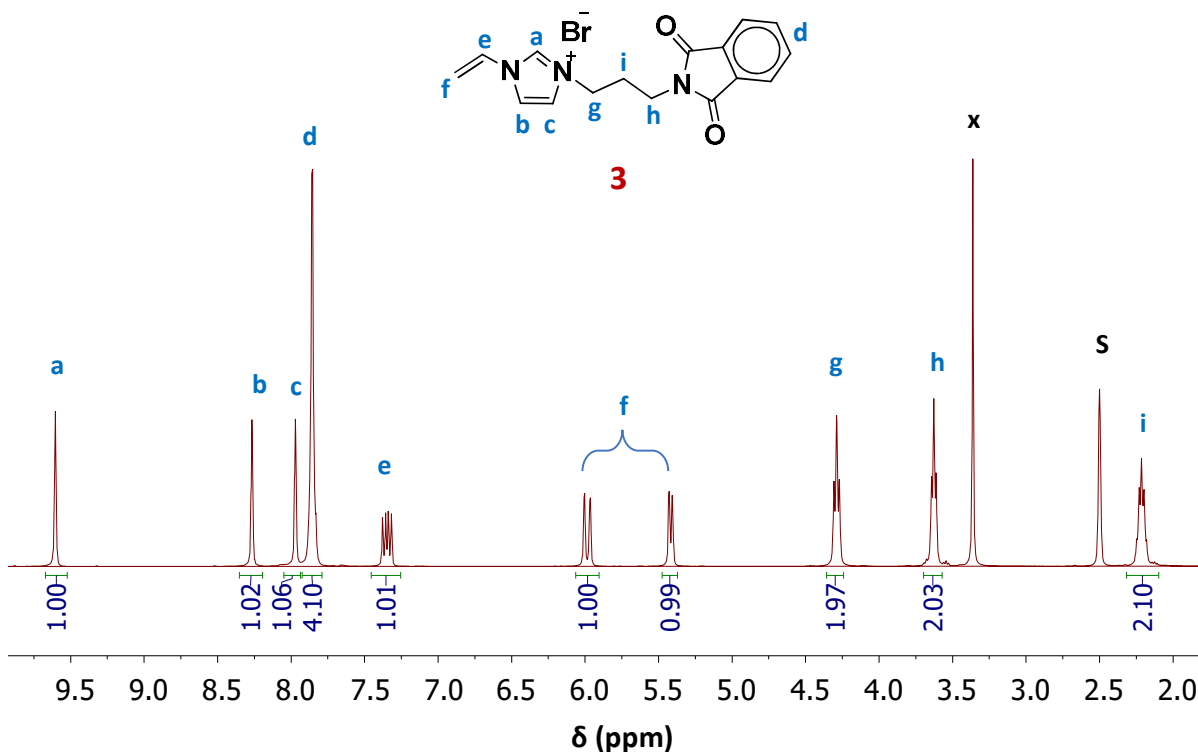

**Figure S1.**  $^1\text{H}$  NMR spectrum of **3** in  $\text{DMSO-}d_6$ ; S: Solvent; x:  $\text{H}_2\text{O}$ .

The  $^{13}\text{C}$  NMR of **3** (**Figure S2**) further confirmed the presumed structure. The peaks at 135.6 ppm (**b**), 119.2 and 123.2 ppm (**h** and **f**) revealed the presence of an imidazolium group.<sup>6</sup> Another proof for the inclusion of the vinylic group within **3** was resembled in the emergence of two peaks at 128.9 and 108.7 ppm (**e** and **i**, respectively).<sup>6</sup> The peak at 168.0 ppm (**a**) was assigned to the carbonyl carbon of the phthalimide unit, and the peaks centered at 134.4, 131.7 and 123.0 ppm (**c**, **d** and **g**, respectively) corresponding to the carbon atoms in the benzene ring.<sup>11</sup> Moreover, the peaks at 46.9, 34.3 and 28.4 ppm (**j**, **k** and **l**) indicated the presence of a methylene carbons of the aliphatic chain.

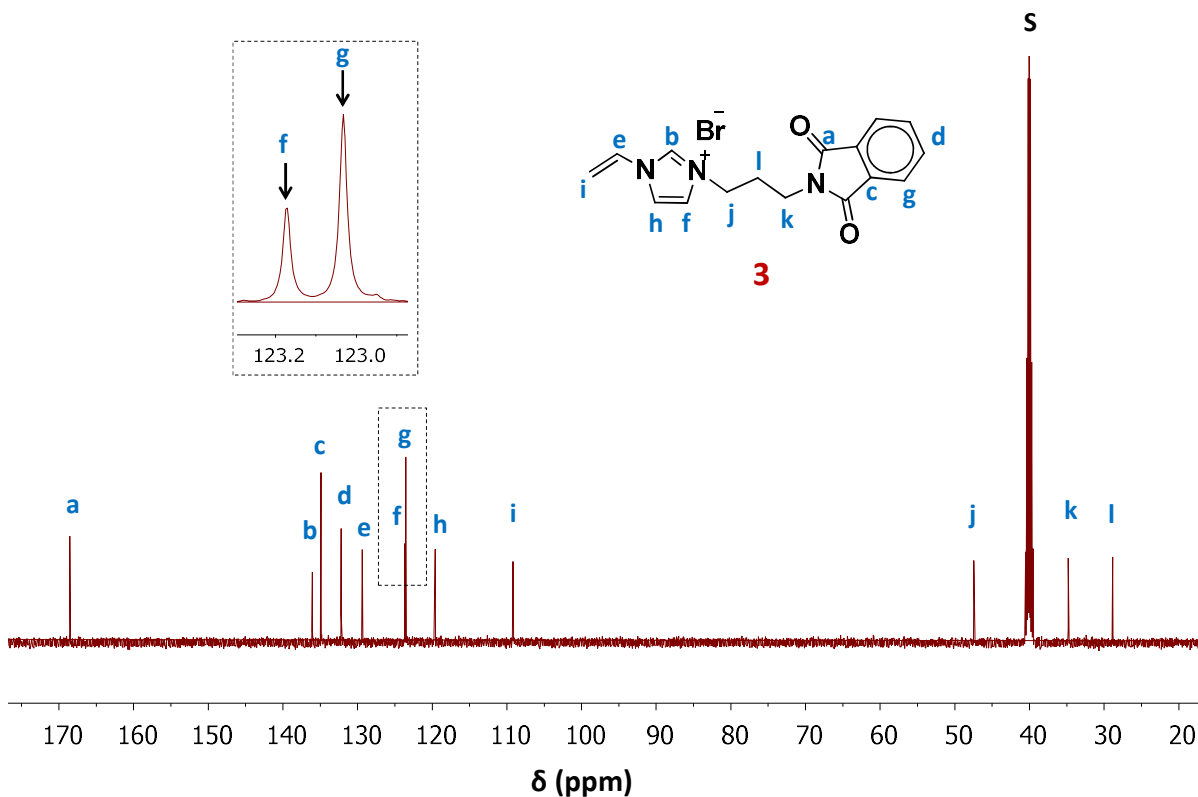

**Figure S2.** <sup>13</sup>C NMR spectrum of **3** in DMSO-*d*<sub>6</sub>; S: Solvent.

The ATR-FTIR was used to investigate the main functional groups of the starting materials and the presumed synthesised products. **Figure S3** shows the spectra of 1-vinylimidazole (**1**), N-(3-bromopropyl)phthalimide (**2**), and **3**. The disappearance of C-Br stretching vibration peak in spectrum of **3** at 532 cm<sup>-1</sup> indicated that the IL was successfully synthesised, in which the peak was observed in the spectrum of **2**.<sup>12</sup> Also, the C=N peaks in the imidazolium ring observed at 1512 and 1487 cm<sup>-1</sup> were shifted to 1572 and 1553 cm<sup>-1</sup> in the ATR-FTIR spectrum of **3** due to formation of the positively charged C=N<sup>+</sup>.<sup>3</sup> The peak assigned to the C=C vinylic group was observed at 1649 cm<sup>-1</sup>.<sup>3,13</sup> The sharp absorption peak at 725 cm<sup>-1</sup> was attributed to the rocking mode of =C-H bond.<sup>14</sup> Additionally, two clear absorptions for the asymmetric and symmetric stretching vibrational modes of O=C-N-C=O bonds within the imide functional group were observed at 1767 cm<sup>-1</sup> and 1710 cm<sup>-1</sup>, respectively,<sup>15-17</sup> and the

peak of the C=C bond of the benzene ring was observed at  $1618\text{ cm}^{-1}$ ; these values indicated the presence of the phthalimide groups.<sup>17</sup>

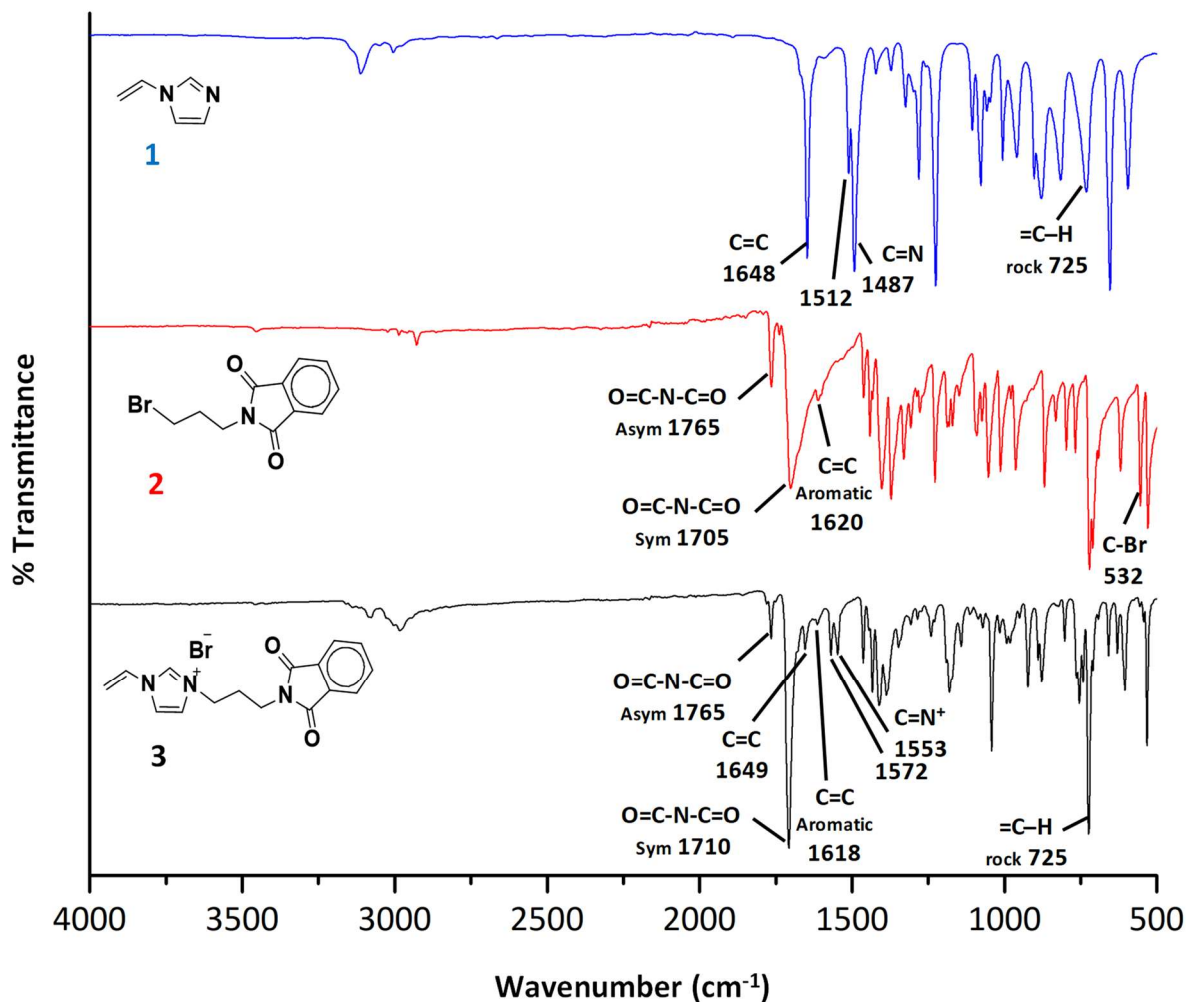

**Figure S3.** ATR-FTIR spectra of 1-vinylimidazole (**1**, blue trace), N-(3-bromopropyl)phthalimide (**2**, red trace) and the IL precursor (**3**, black trace).

## 5.2. Characterisation of N-allylphthalimide monomer (**6**)

The aromatic hydrogens of the phthalimide moiety were observed as a multiplet peak at 7.84 ppm (**d**) in the <sup>1</sup>H NMR of **6** as shown in **Figure S4**. The vinylic hydrogens appeared as multiplets centered at 5.88 and 5.13 ppm (**c** and **b**). Furthermore, the methylene protons were observed as a distinct doublet at 4.17 ppm (**a**).<sup>18</sup>

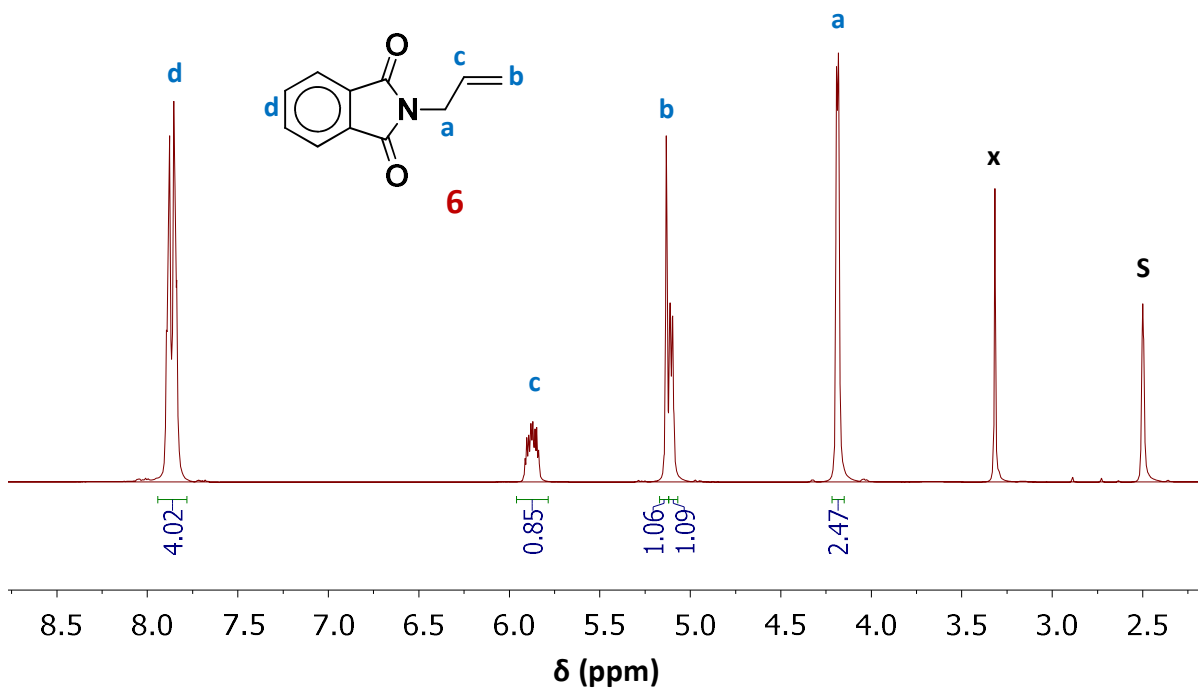

**Figure S4.** <sup>1</sup>H NMR spectrum of **6** in DMSO-*d*<sub>6</sub>; **S**: Solvent; **x**: H<sub>2</sub>O.

The <sup>13</sup>C NMR spectrum of **6** is shown in **Figure S5**. The observed peak at 167.5 ppm (**a**) was assigned to the carbonyl group of the phthalimide group. The signals for the benzene ring carbons of the corresponding group were observed at 132.4, 131.5 and 123.1 ppm (**c**, **e**, and **d**), respectively. Moreover, the peaks at 134.4 and 116.3 ppm (**b** and **f**) referred to the carbons in the vinylic bond. While, the lowest chemical shift at 39.5 ppm (**g**) referred to the methylene carbon which further verified the structure of **6**.<sup>18</sup>



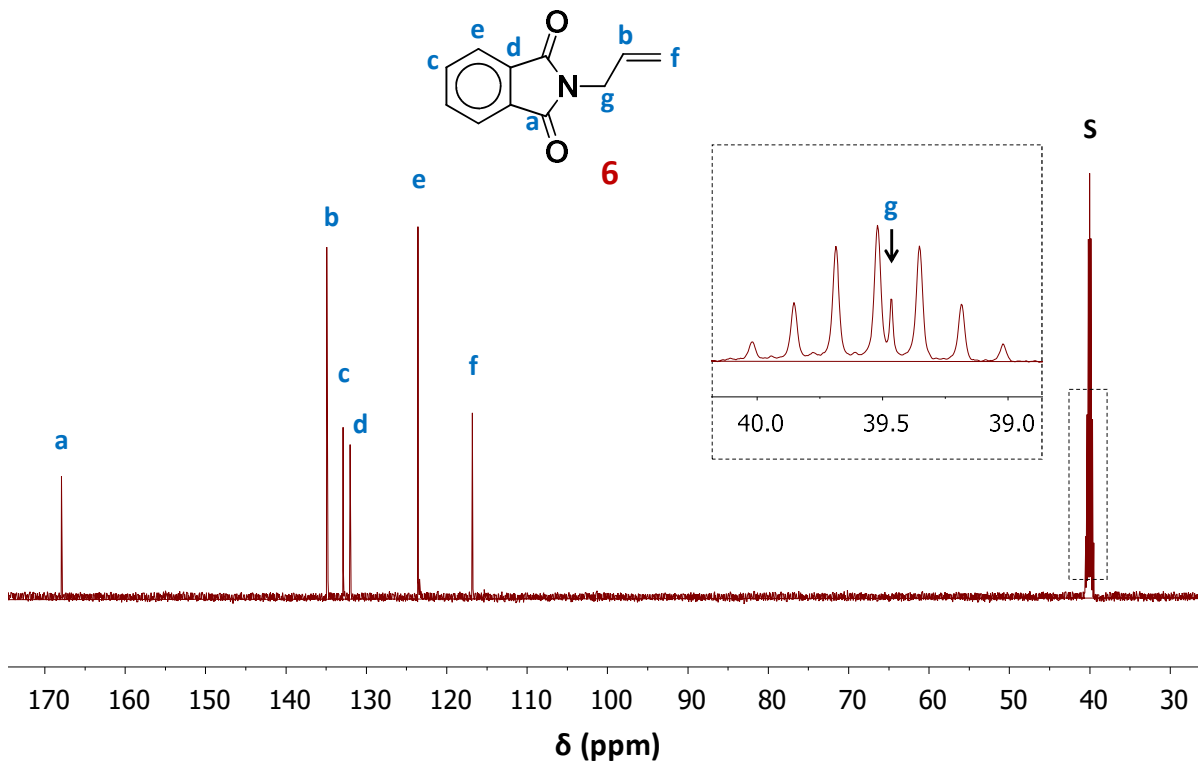

**Figure S5.**  $^{13}\text{C}$  NMR spectrum of **6** in  $\text{DMSO-}d_6$ ; S: Solvent.

**Figure S6** shows the ATR-FTIR spectra in the  $500$  to  $4000\text{ cm}^{-1}$  range for the allyl chloride (**4**), potassium phthalimide (**5**) and **6**. The disappearance of the C-Cl peak which was observed at  $733\text{ cm}^{-1}$  in **4**, indicated a successful quaternarisation process.<sup>19</sup> The characteristic peaks at  $1765$  and  $1697\text{ cm}^{-1}$  were associated with absorptions for the asymmetric and symmetric  $\text{O}=\text{C}-\text{N}-\text{C}=\text{O}$  modes of vibration, respectively.<sup>15</sup> In addition, the benzene ring  $\text{C}=\text{C}$  stretching frequency was observed at  $1620\text{ cm}^{-1}$ , indicating the presence of the phthalimide group.<sup>17</sup>

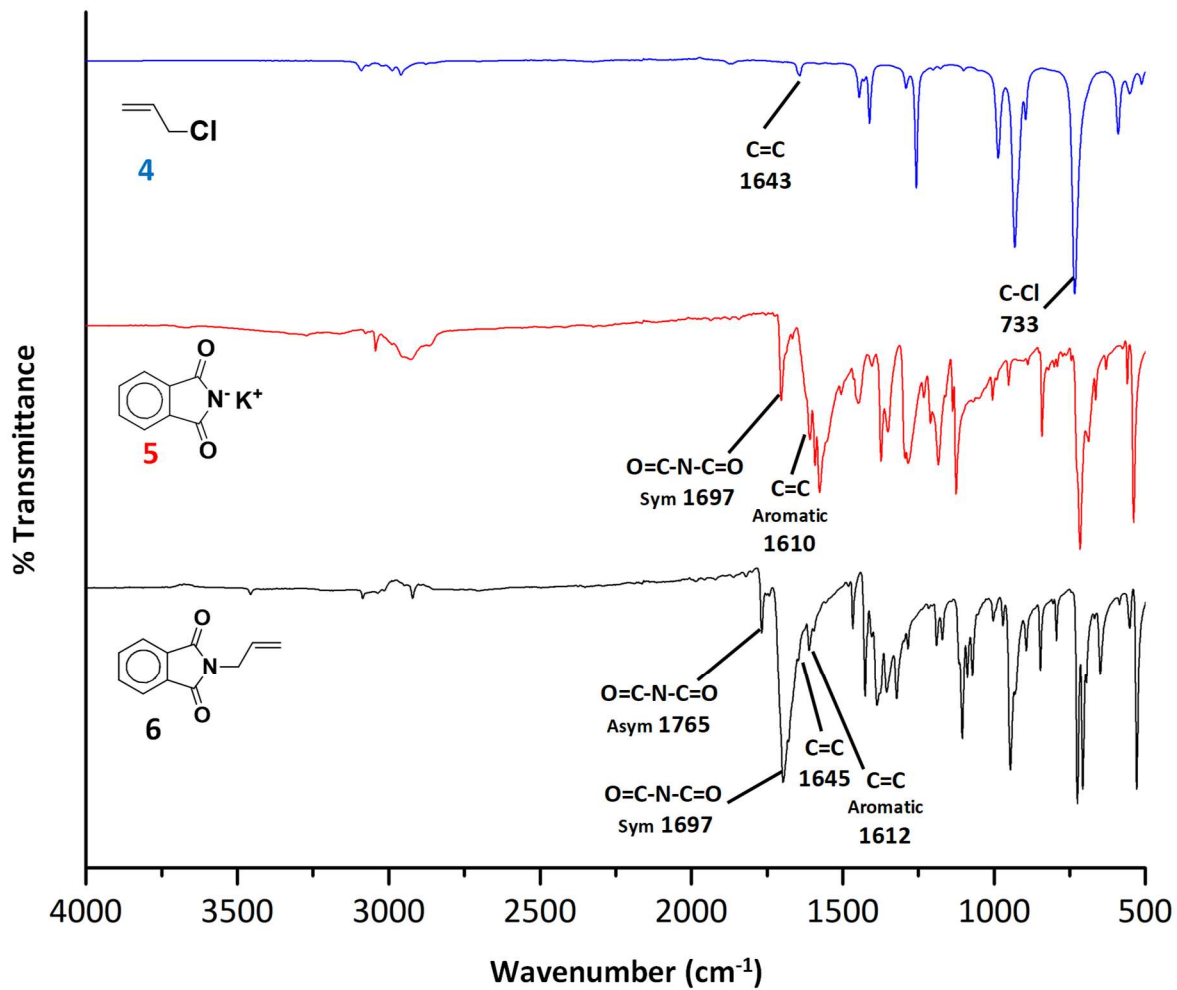

**Figure S6.** ATR-FTIR spectra of allyl chloride (**4**, blue trace), potassium phthalimide (**5**, red trace) and **6** (black trace).

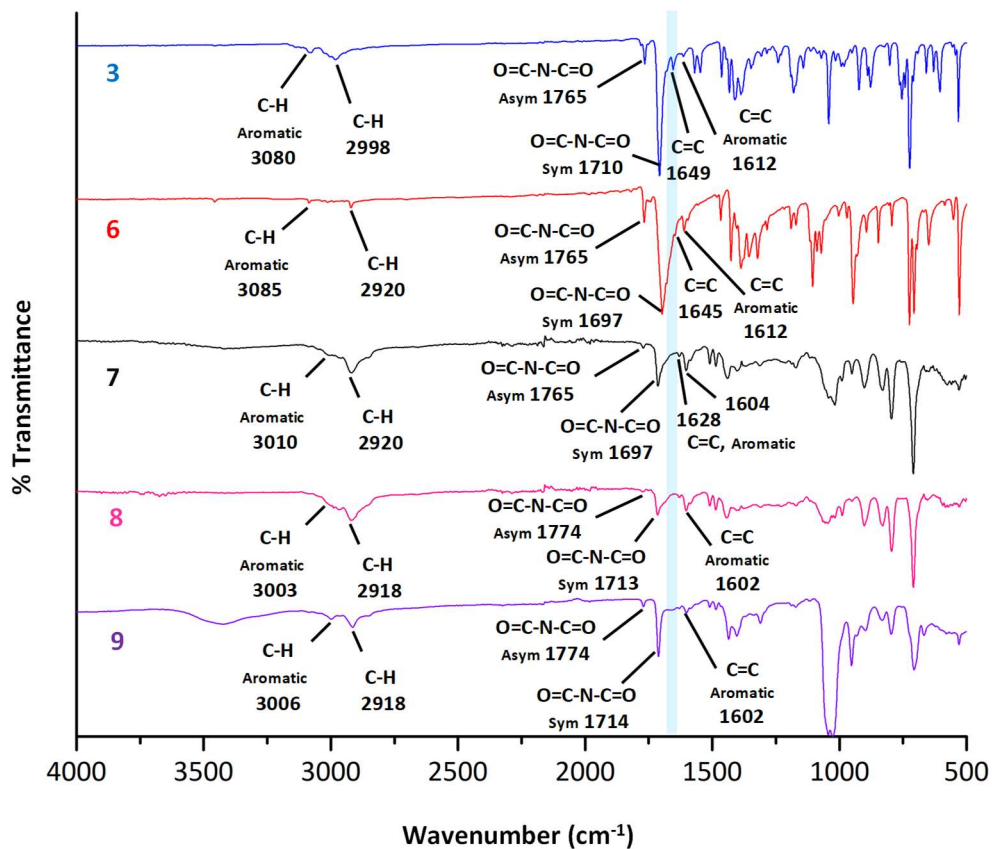

**Figure S7.** ATR-FTIR spectra of **3** (blue trace), **6** (red trace), *co*-PIL-x1 (**7**, black trace), *co*-PIL-x2 (**8**, pink trace) and *co*-PIL-x4 (**9**, violet trace).

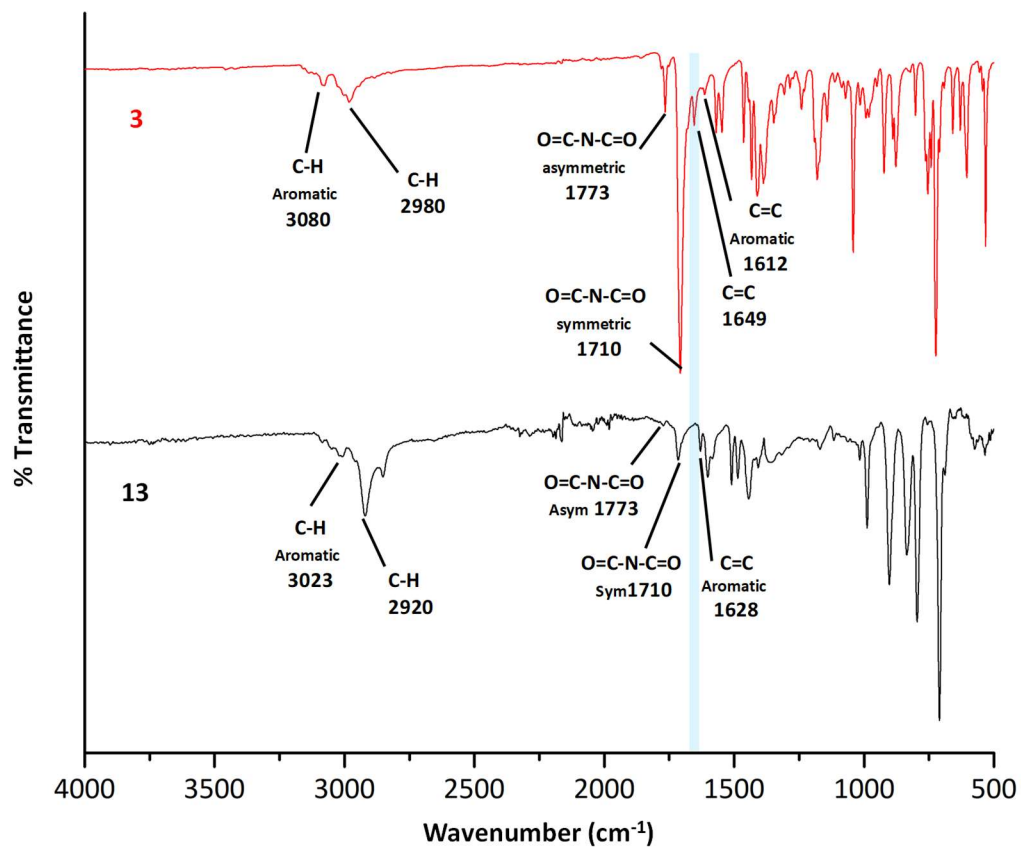

**Figure S8.** ATR-FTIR spectra of **3** (black trace) and *homo*-PIL-x1 (**13**, red trace).

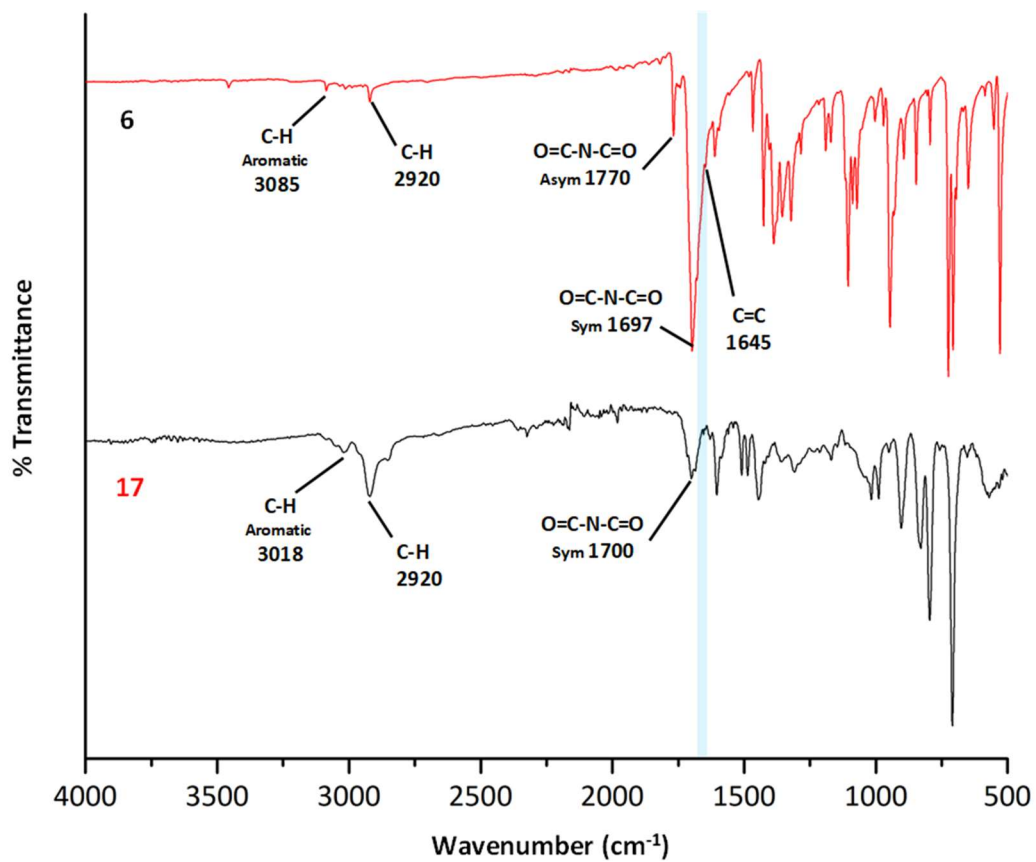

**Figure S9.** ATR-FTIR spectra of **6** (black trace) and *homo*-PAP (**17**, red trace).

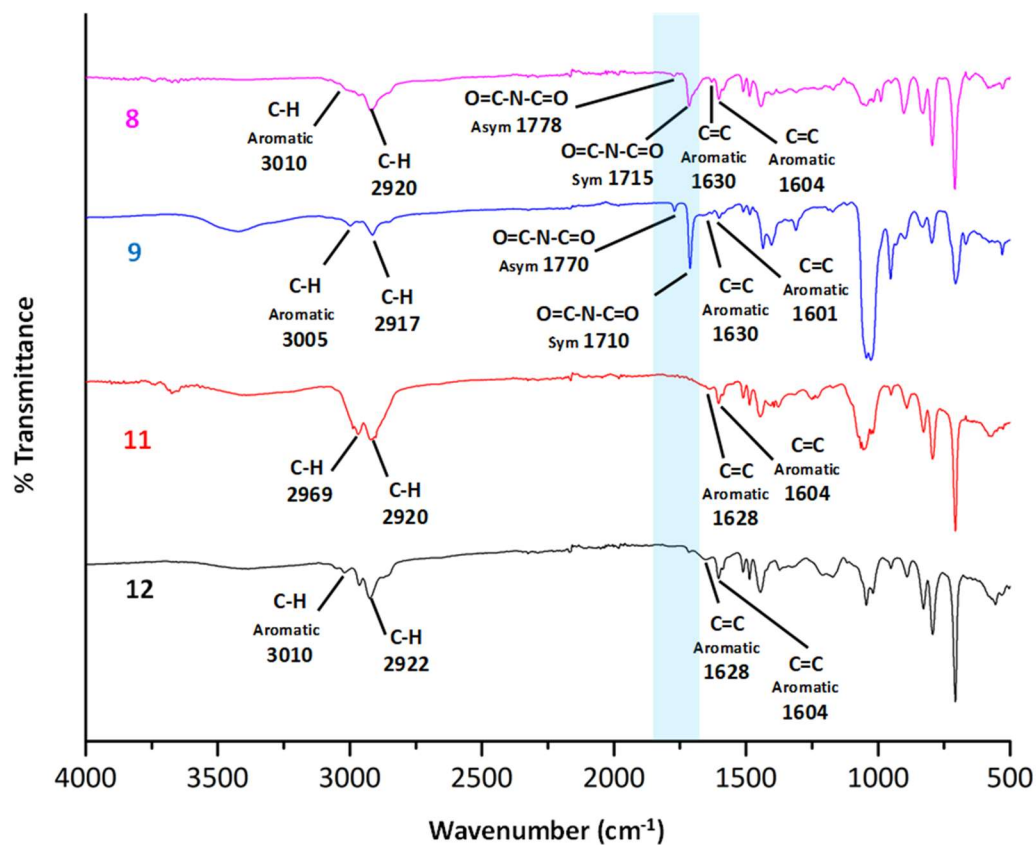

**Figure S10.** ATR-FTIR spectra of the prepared *co*-PILs: *co*-PIL-x2 (**8**, black trace), *co*-PIL-NH<sub>2</sub>-x2 (**11**, red trace), *co*-PIL-x4 (**9**, blue trace) and *co*-PIL-NH<sub>2</sub>-x4 (**12**, magenta trace).

**Table S3.** Specific surface area measurements for the synthesised PILs by multi-point BET.

| Material  | S <sub>BET</sub> (m <sup>2</sup> /g) |
|-----------|--------------------------------------|
| <b>8</b>  | 874                                  |
| <b>11</b> | 1378                                 |
| <b>9</b>  | 994                                  |
| <b>12</b> | 1360                                 |
| Poly(DVB) | 239                                  |

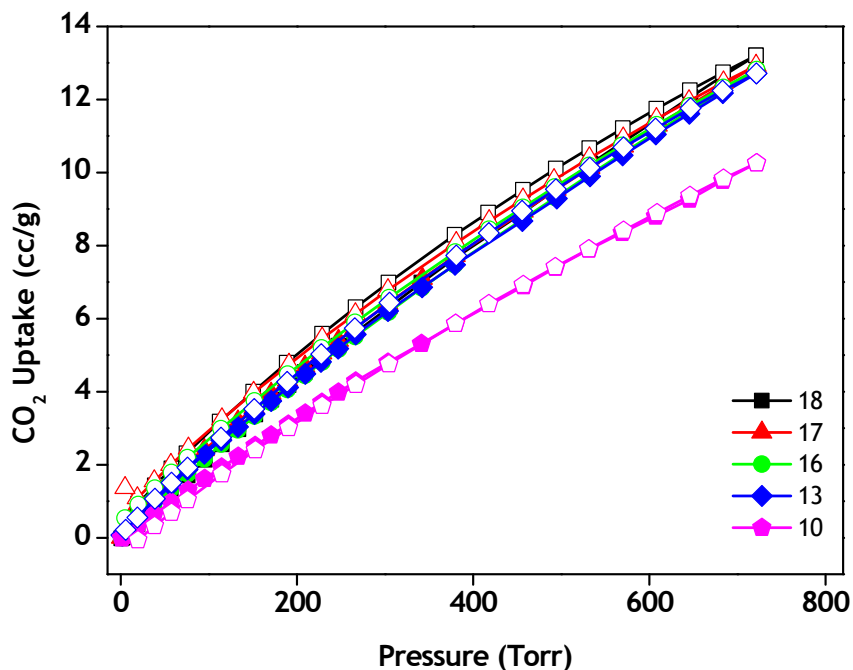

**Figure S11.** CO<sub>2</sub> sorption isotherms of the synthesised polymers (**10**, **13**, **16-18**) at 298 K. Filled and unfilled symbols show gas adsorption and desorption patterns, respectively.

**Table S4.** CO<sub>2</sub> capture efficiency data for vinylimidazolium-based PILs.

| Substances                                         | CO <sub>2</sub> uptake (mmol CO <sub>2</sub> /g sorbent) |
|----------------------------------------------------|----------------------------------------------------------|
| <i>co</i> -PIL-NH <sub>2</sub> -x1 ( <b>10</b> )   | 0.457                                                    |
| <i>homo</i> -PIL-x1 ( <b>13</b> )                  | 0.567                                                    |
| <i>homo</i> -PIL-NH <sub>2</sub> -x1 ( <b>16</b> ) | 0.572                                                    |
| <i>homo</i> -PAP ( <b>17</b> )                     | 0.577                                                    |
| <i>homo</i> -PAA ( <b>18</b> )                     | 0.589                                                    |

**Table S5.** Frontier-orbital contour plots for the optimised geometries (at B3LYP/6-31G\* level of theory) for the monomeric reactants, and the HOMO-LUMO energy gaps.

|   | HOMO | LUMO | $\Delta E_{(\text{HOMO-LUMO})} / \text{eV}$ |
|---|------|------|---------------------------------------------|
| 3 |      |      | 4.61                                        |

|     |  |  |      |
|-----|--|--|------|
| 6   |  |  | 4.95 |
| DVB |  |  | 4.41 |

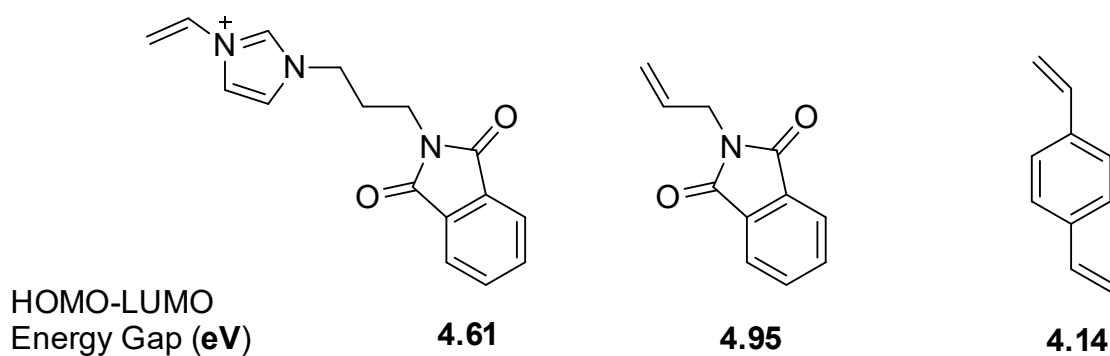

**Figure S12.** Calculated HOMO-LUMO gaps for the starting materials (at B3LYP/6-31G\* in gas phase using Gaussian 09 program).

**Table S6.** Catalytic performance of various PILs for the cycloaddition of CO<sub>2</sub> versus PO, ECH and SO

| Entry | Catalyst | Epoxide | <i>P</i> (bar) | <i>T</i> (°C) | Time (h) | Yield (%) | Selectivity (%) | Ref |
|-------|----------|---------|----------------|---------------|----------|-----------|-----------------|-----|
| 1     |          | PO      | 60             | 110           | 6        | 97        | --              | 20  |
|       |          | ECH     |                |               | 3        | 96        |                 |     |
| 2     |          | PO      | 60             | 110           | 6        | 75        | --              | 20  |



|   |                                                                                                  |     |    |     |    |     |     |    |
|---|--------------------------------------------------------------------------------------------------|-----|----|-----|----|-----|-----|----|
| 3 | 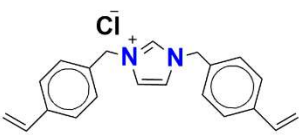 <sup>c</sup>   | ECH | 50 | 140 | 3  | 98  | >99 | 21 |
| 4 |  <sup>d</sup>   | ECH | 50 | 140 | 3  | 98  | >99 | 21 |
| 5 |  <sup>e</sup>   | ECH | 25 | 130 | 3  | 98  | 99  | 22 |
| 6 |  <sup>f</sup>   | ECH | 1  | 25  | 96 | 96  | >99 | 23 |
| 7 |  <sup>g</sup> | ECH | 1  | 50  | 24 | 98  | >99 | 6  |
| 8 |  <sup>h</sup> | ECH | 1  | 120 | 10 | >99 | 99  | 24 |

|    |                                                                                     |     |    |     |    |     |     |           |
|----|-------------------------------------------------------------------------------------|-----|----|-----|----|-----|-----|-----------|
| 9  | 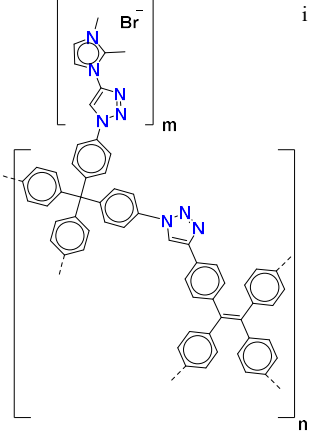   | ECH | 1  | 100 | 24 | >99 | >99 | 25        |
| 10 |    | ECH | 20 | 100 | 4  | 99  | 99  | 26        |
| 11 |   | SO  | 10 | 100 | 5  | 93  | -   | 27        |
| 12 |  | ECH | 10 | 110 | 24 | 99  | -   | This Work |

<sup>a</sup> Highly cross-linked polymer-supported IL; poly(3-butyl-1-vinylimidazolium chloride)(divinyl benzene). <sup>b</sup> Poly(3-butyl-1-vinylimidazolium chloride). <sup>c</sup> 1,3-bis(4-vinylbenzyl) imidazolium chloride. <sup>d</sup> Cross-linked poly(bis-1,3-vinylbenzyl) imidazolium chloride. <sup>e</sup> Cross-linked polymer-supported IL; poly(1-vinyl-3-carboxyethylimidazolium bromide)(divinylbenzene). <sup>f</sup> Hyper cross-linked poly(2-phenylimidazolium bromide). <sup>g</sup> Poly(1,2,3,4,5,6-hexakis (methyl) benzene vinylimidazolium bromide); the shown chemical structure corresponds for the monomeric unit. <sup>h</sup> Imidazolium-based ionic polymer (ImIP/Host)@ (COF/guest). <sup>i</sup> Polymer from tetrakis(4-azidophenyl)methane, 1,1,2,2-tetrakis(4-ethynylphenyl)ethane and 1,2-Dimethyl-3-(prop-2-ynyl)-1H-imidazol-3-ium bromide. <sup>j</sup> Poly bis-imidazolium ionic liquids. <sup>k</sup> Rose Bengal (RB) immobilised onto supported ionic liquid-like phases.

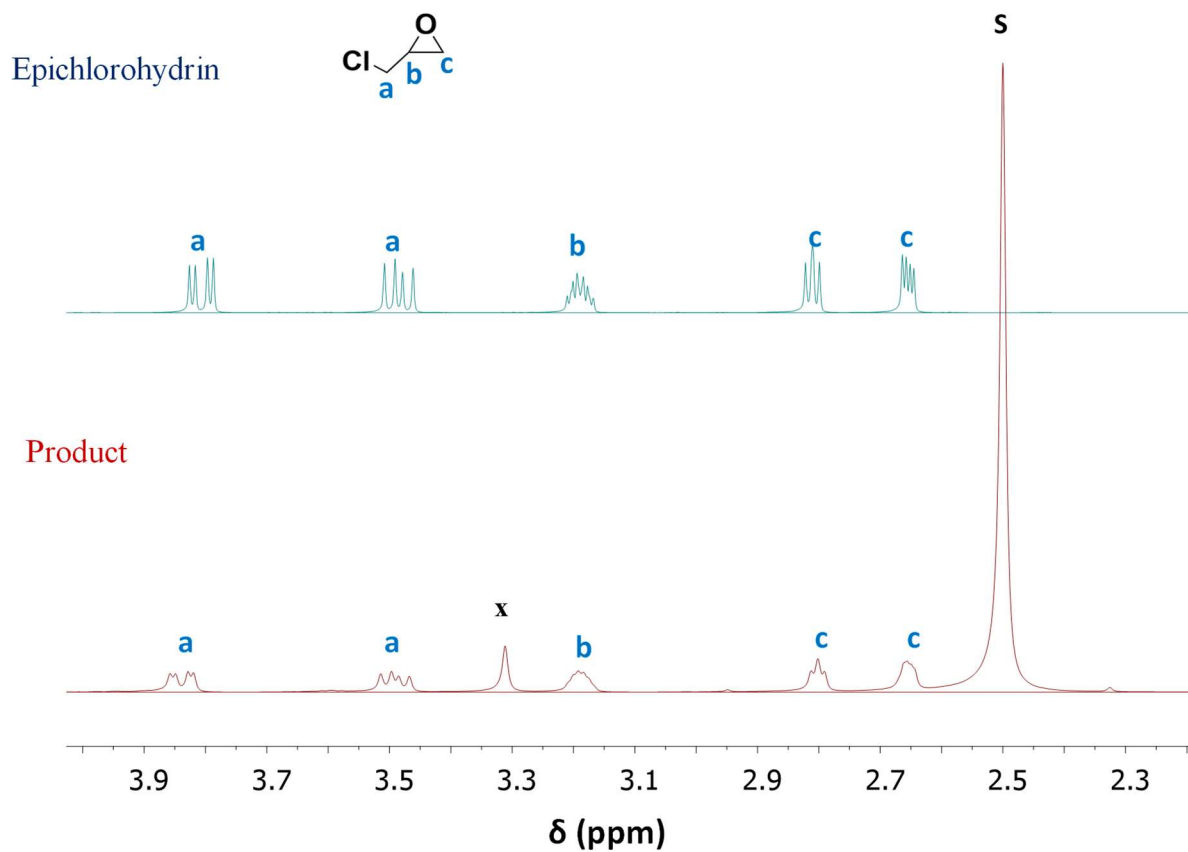

**Figure S13.** The  $^1\text{H}$  NMR spectra of the ECH with 0% conversion of its corresponding CC in  $\text{DMSO-}d_6$ ; S: Solvent; x:  $\text{H}_2\text{O}$ , catalyzed by poly(DVB) (Entry 1, Table 2).

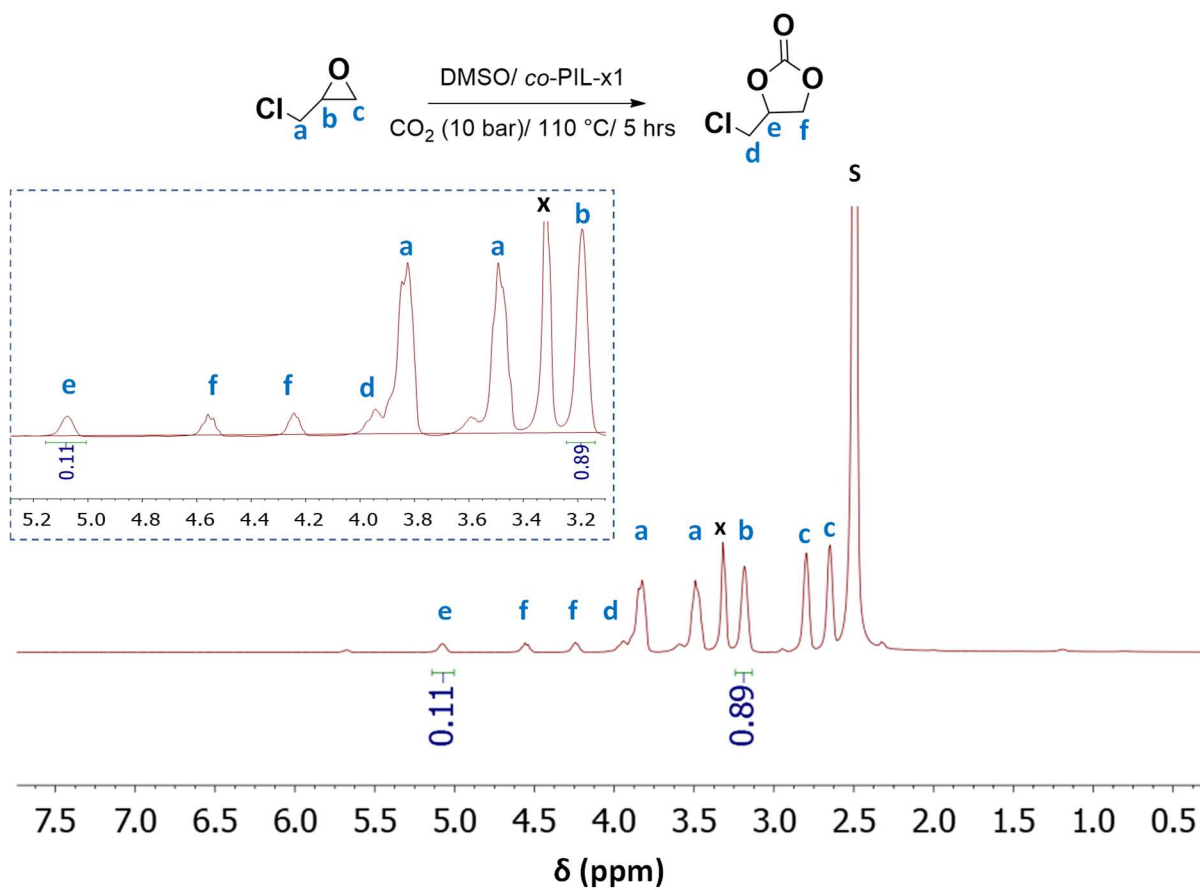

**Figure S14.** The  $^1\text{H}$  NMR spectrum of epichlorohydrin carbonate in  $\text{DMSO-}d_6$ ; S: Solvent; x:  $\text{H}_2\text{O}$ , catalyzed by *co-PIL-x1* at 5 h with a conversion of 11% (Entry 2, Table 2).

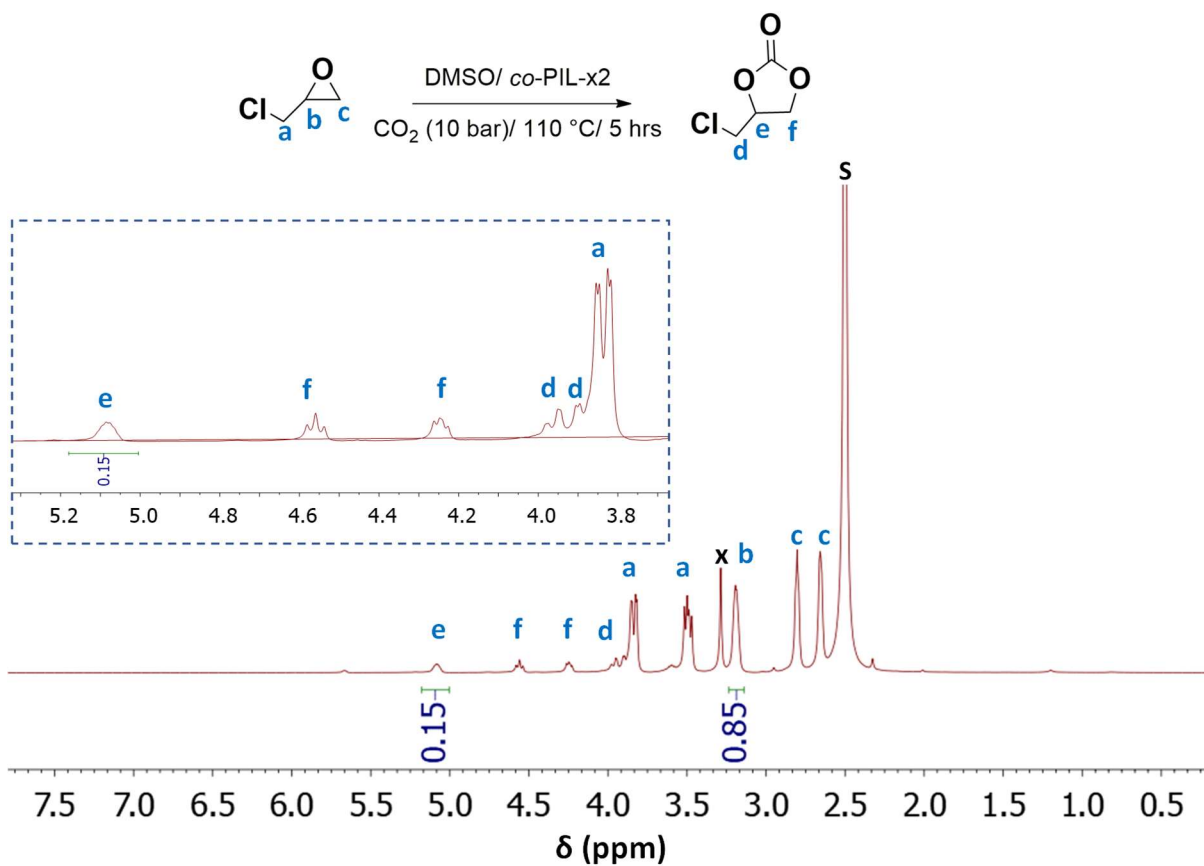

**Figure S15.** The  $^1\text{H}$  NMR spectrum of epichlorohydrin carbonate in  $\text{DMSO-}d_6$ ; S: Solvent; x:  $\text{H}_2\text{O}$  catalyzed by *co-PIL-x2* at 5 h with a conversion of 15%. (Entry 3, Table 2).

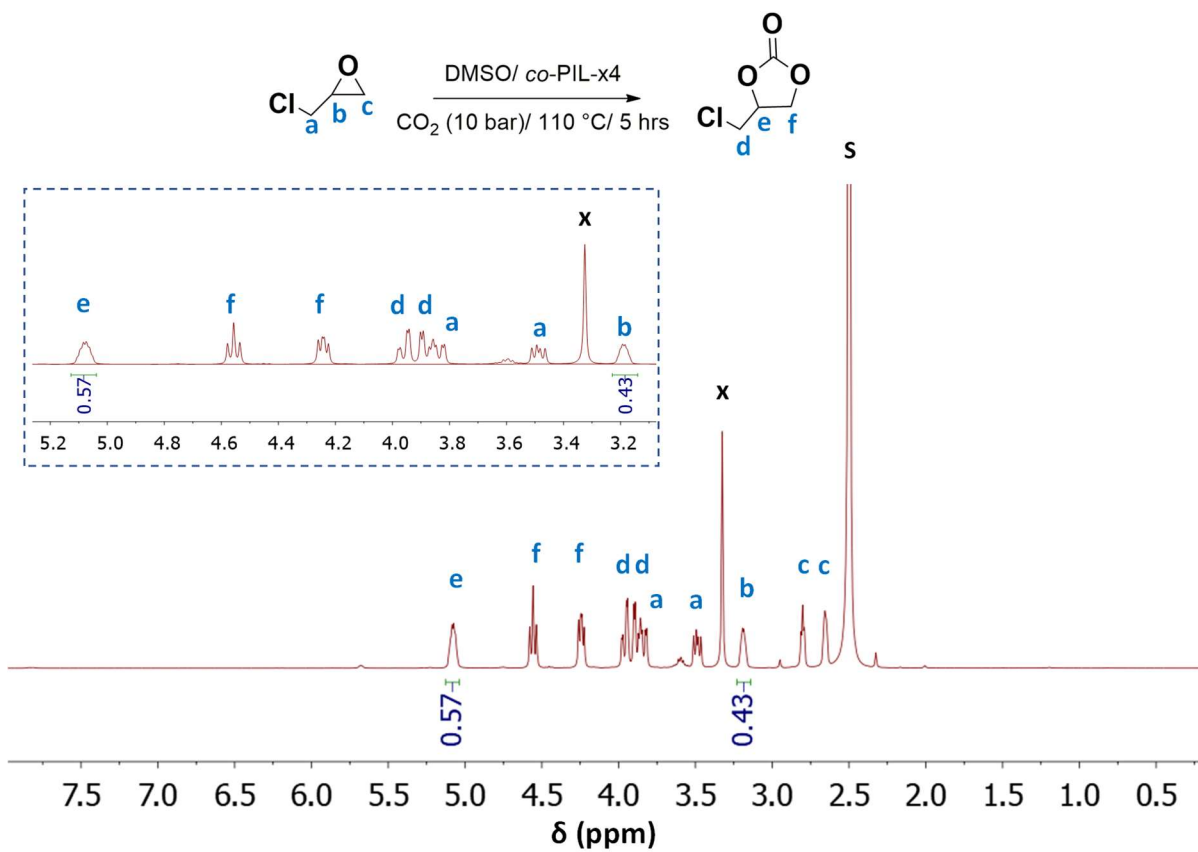

**Figure S16.** The  $^1\text{H}$  NMR spectra of epichlorohydrin carbonate in  $\text{DMSO-}d_6$ ; S: Solvent; x:  $\text{H}_2\text{O}$  catalyzed by *co*-PIL-x4 at 5 h with a conversion of 57% (Entry 4, Table 2).

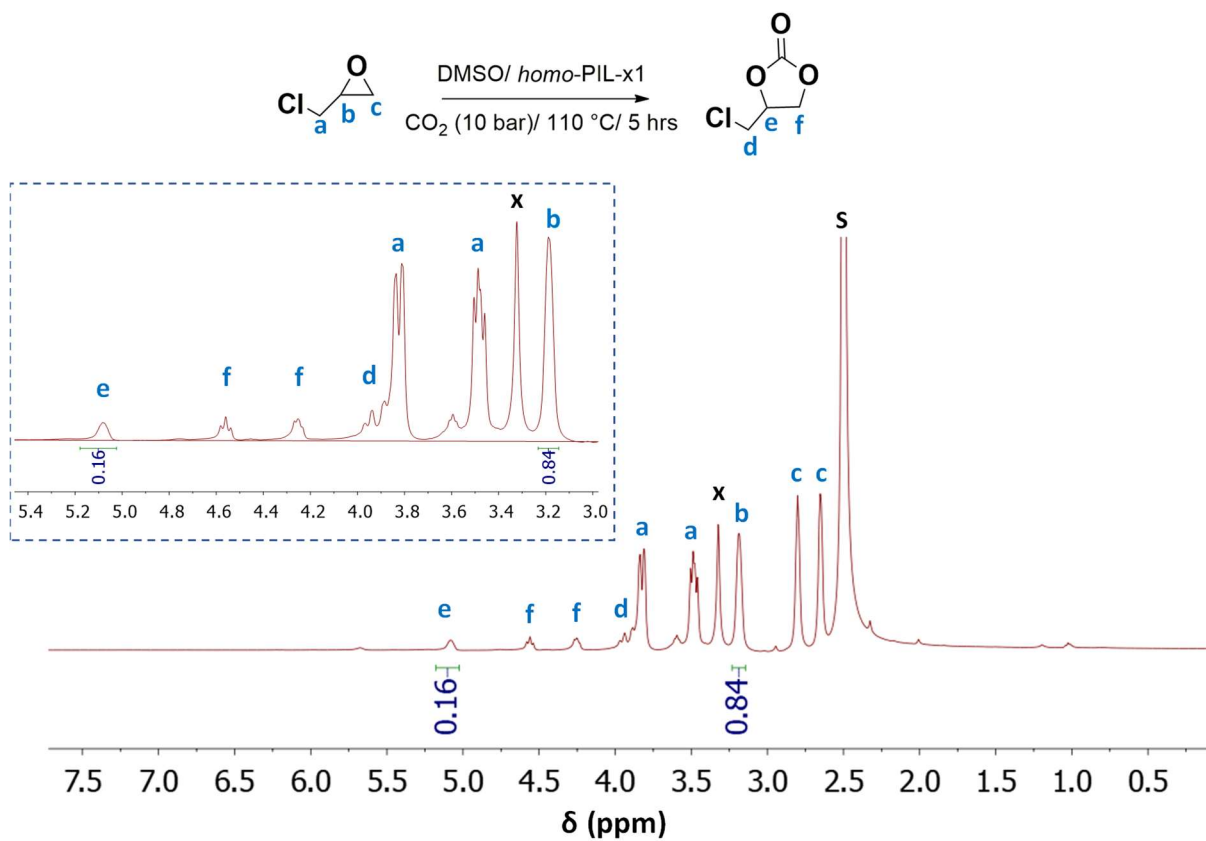

**Figure S17.** The  $^1\text{H}$  NMR spectrum of epichlorohydrin carbonate in  $\text{DMSO-}d_6$ ; S: Solvent; x:  $\text{H}_2\text{O}$  catalyzed by *homo*-PIL-x1 at 5 h with a conversion of 16% (Entry 5, Table 2).

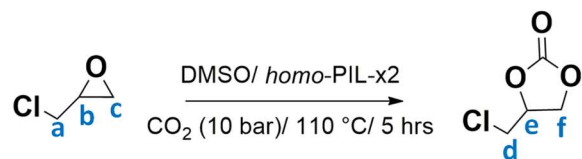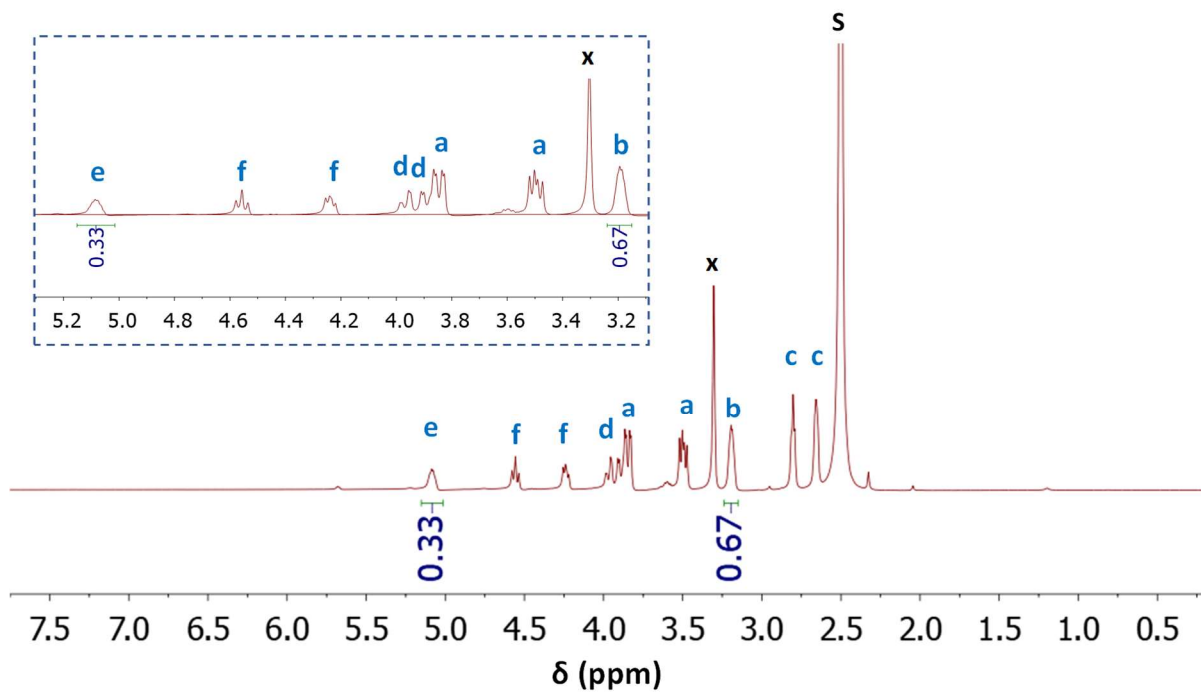

**Figure S18.** The  $^1\text{H}$  NMR spectrum of epichlorohydrin carbonate in  $\text{DMSO-}d_6$ ; S: Solvent; x:  $\text{H}_2\text{O}$  catalyzed by *homo*-PIL-x2 at 5 h with a conversion of 33% (Entry 6, Table 2).



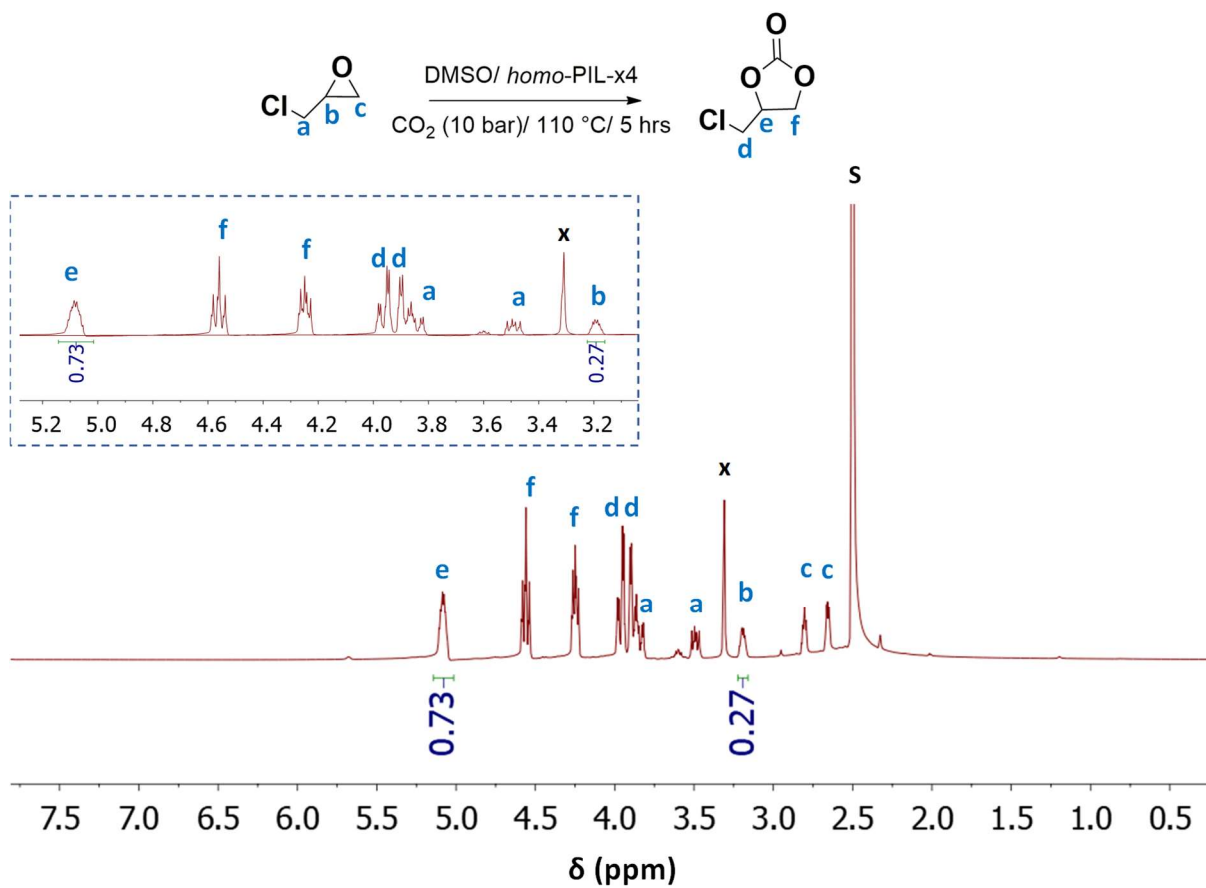

**Figure S19.** The  $^1\text{H}$  NMR spectrum of epichlorohydrin carbonate in  $\text{DMSO-}d_6$ ; S: Solvent; x:  $\text{H}_2\text{O}$  catalyzed by *homo*-PIL-x4 at 5 h with a conversion of 73% (Entry 6, Table 2).

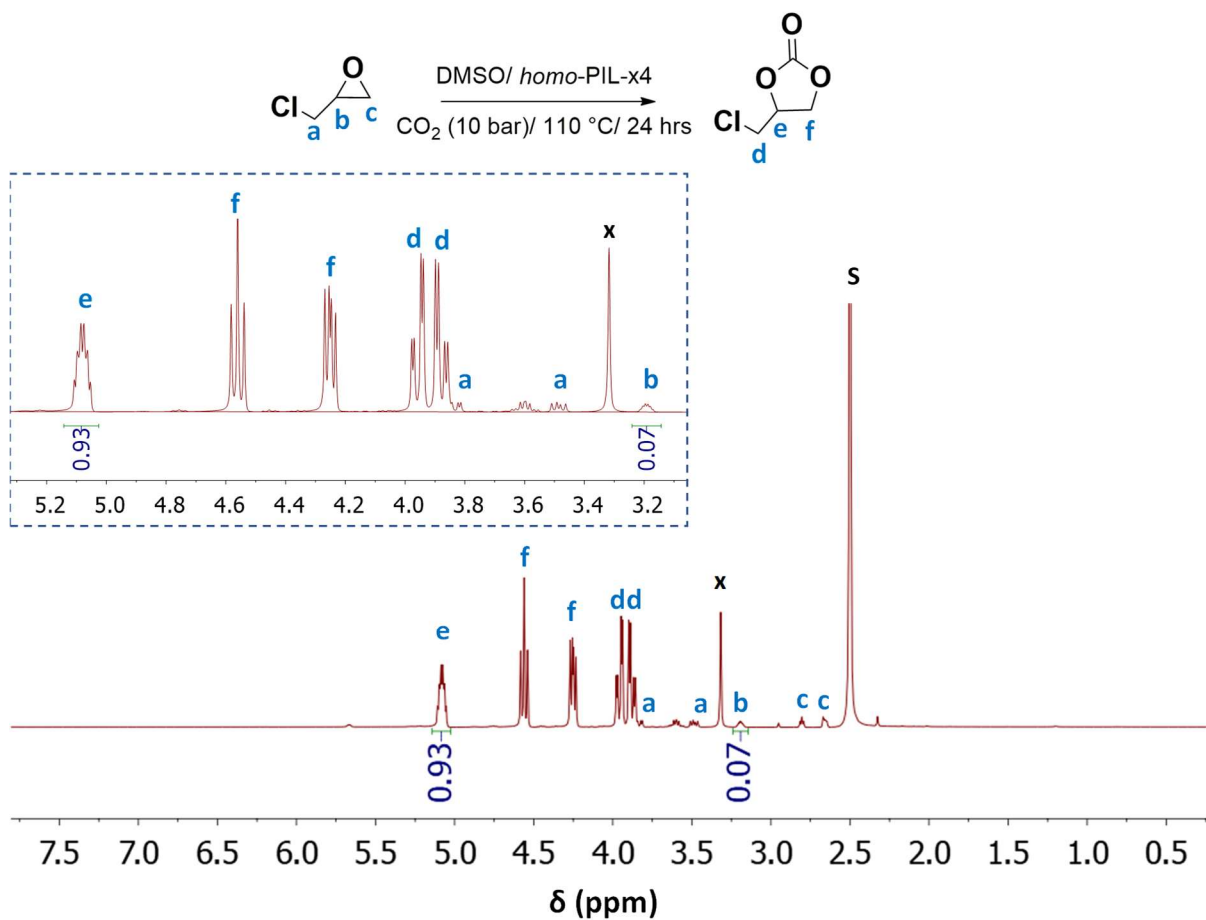

**Figure S20.** The  $^1\text{H}$  NMR spectrum of the epichlorohydrin carbonate in  $\text{DMSO-}d_6$ ; **S**: Solvent; **x**:  $\text{H}_2\text{O}$  catalyzed by *homo*-PIL-x4 at 24 h with a conversion of 93% (Entry 8, Table ).

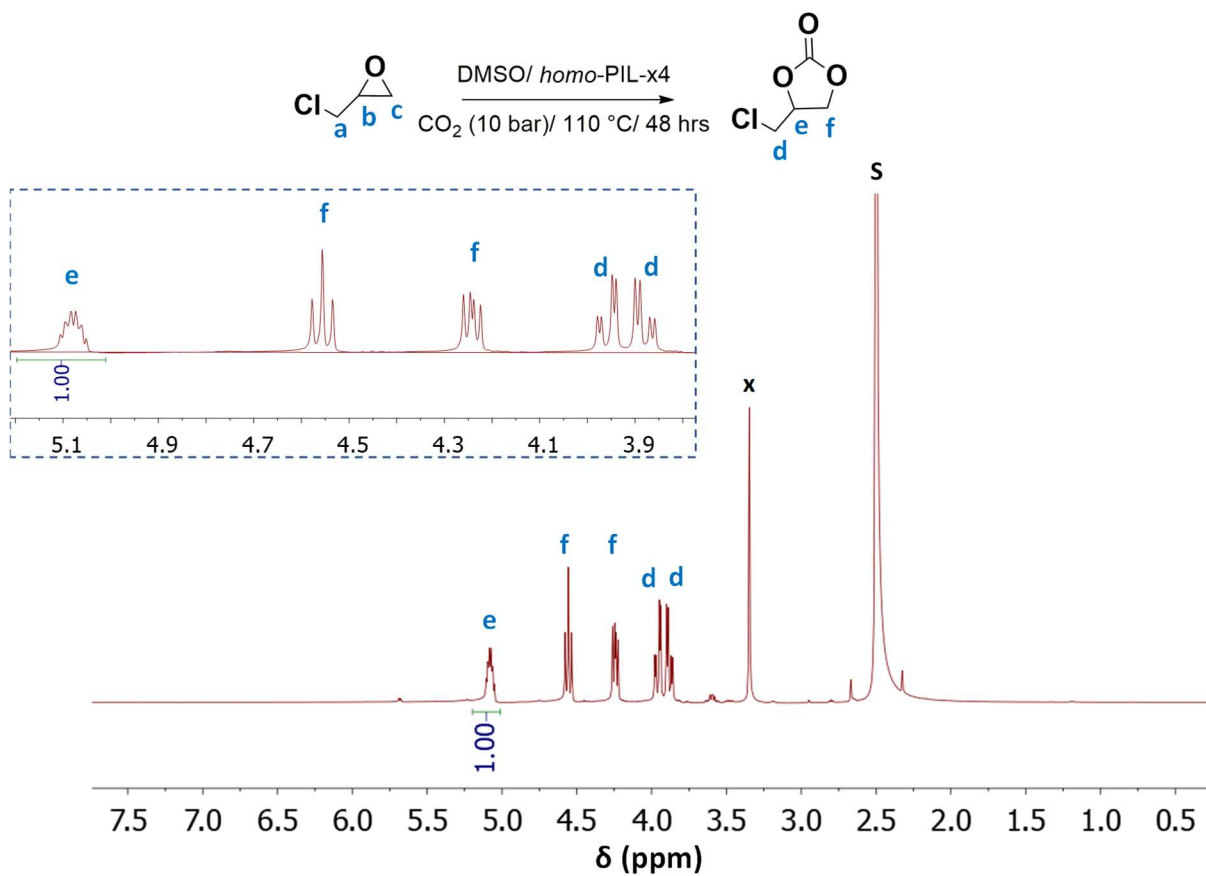

**Figure S21.** The  $^1\text{H}$  NMR spectrum of the epichlorohydrin carbonate in  $\text{DMSO-}d_6$ ; S: Solvent; x:  $\text{H}_2\text{O}$  catalyzed by *homo-PIL-x4* at 48 h with a full conversion (Entry 9, Table 2).

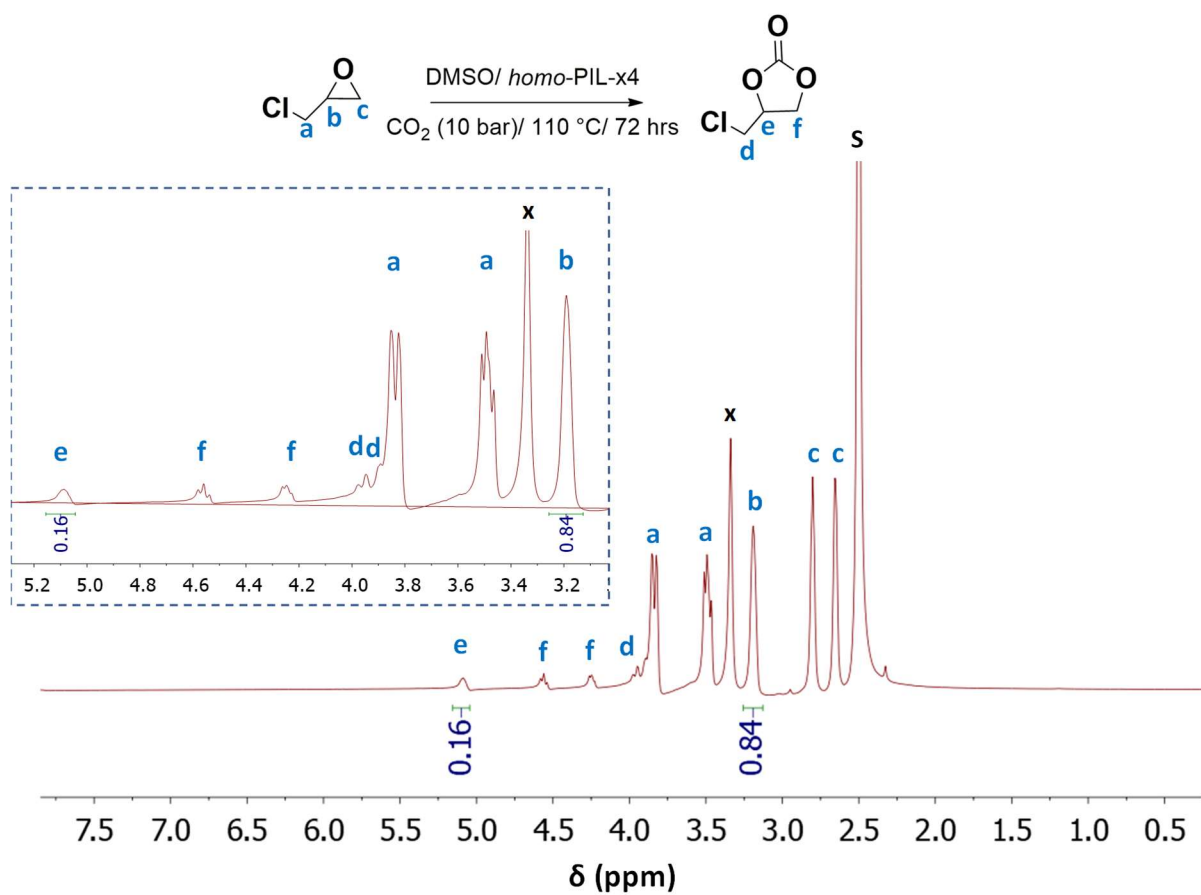

**Figure S22.** The  $^1\text{H}$  NMR spectrum of the epichlorohydrin carbonate in  $\text{DMSO-}d_6$ ; S: Solvent; x:  $\text{H}_2\text{O}$  catalyzed by *homo*-PIL-x4 at  $P_{\text{CO}_2}$  (1 atm)/ T (20 °C) for 72 h with a conversion of 16% (Entry 10, Table 2).

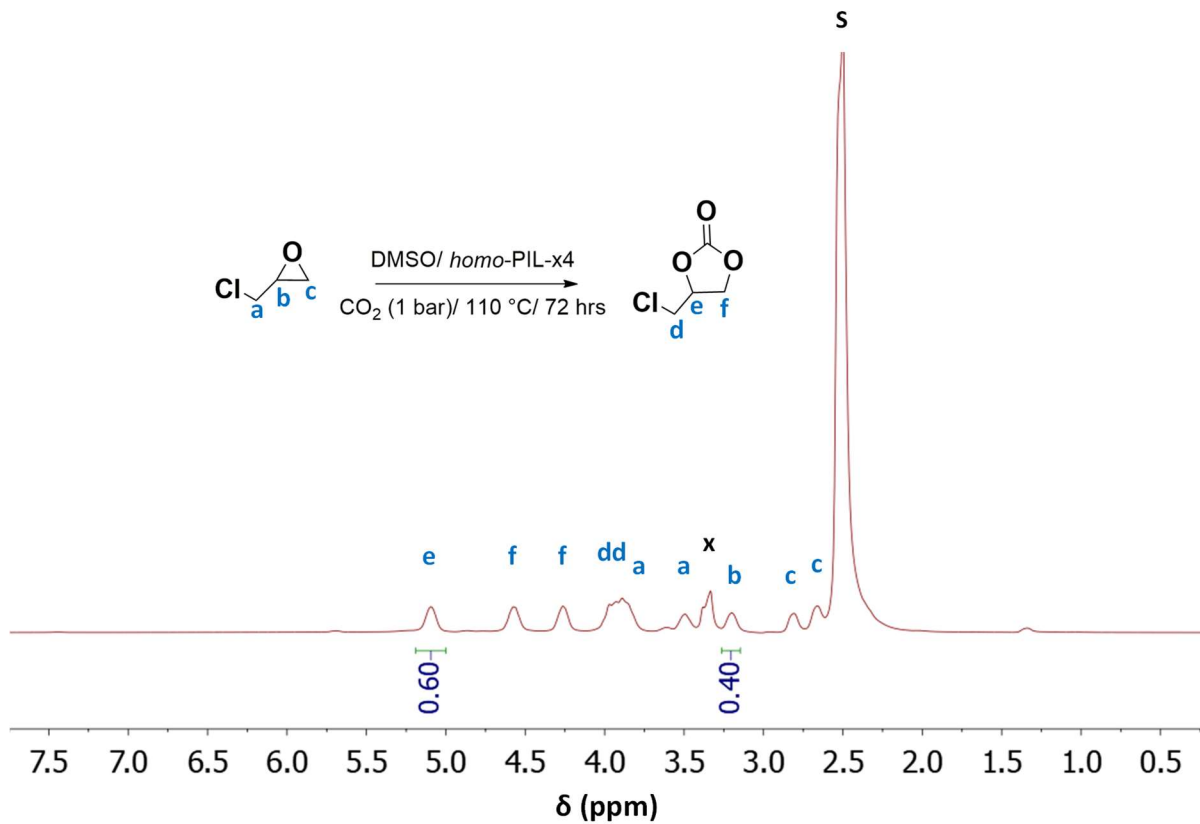

**Figure S23.** The <sup>1</sup>H NMR spectrum of the epichlorohydrin carbonate in DMSO-*d*<sub>6</sub>; S: Solvent; x: H<sub>2</sub>O catalyzed by *homo*-PIL-x4 at P<sub>CO<sub>2</sub></sub> (1 bar)/ T (110 °C) for 72 h with a conversion of 60% (Entry 11, Table 2).

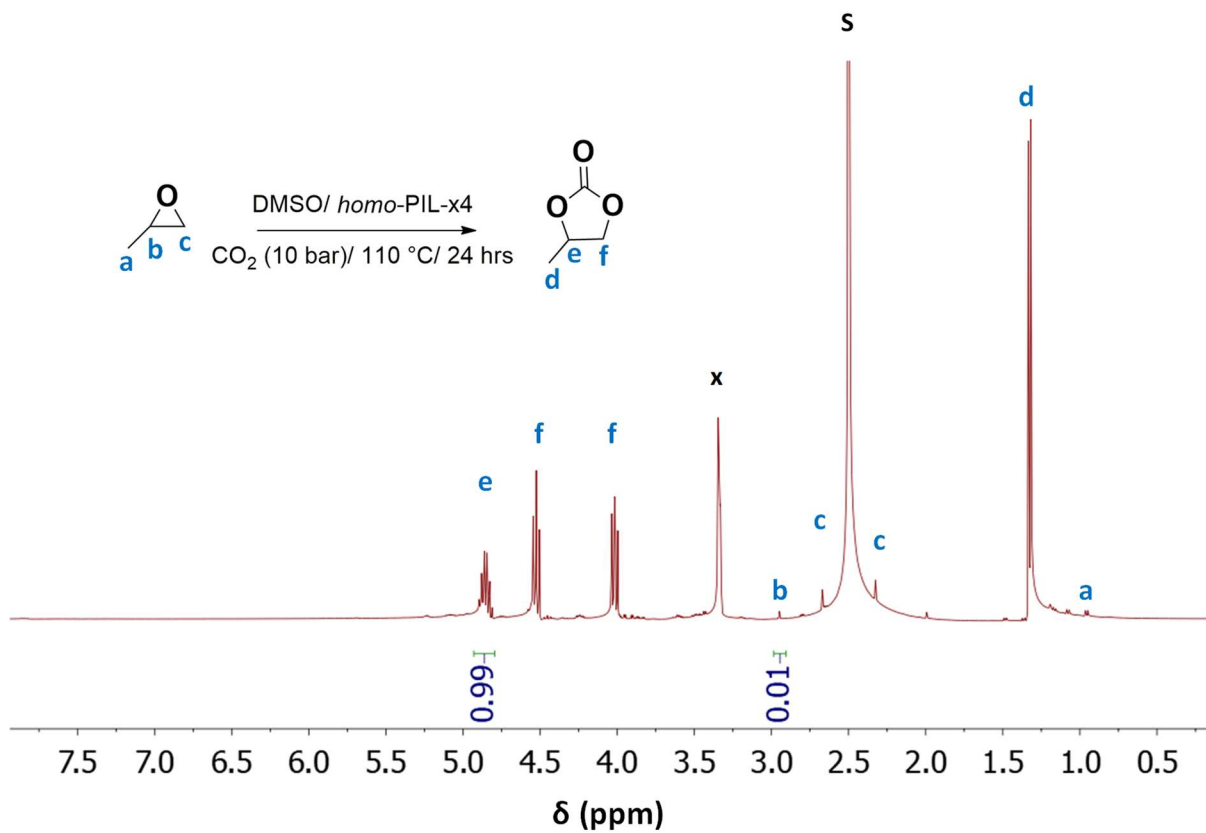

**Figure S24.** The <sup>1</sup>H NMR spectrum of the propylene carbonate in DMSO-*d*<sub>6</sub>; S: Solvent; x: H<sub>2</sub>O catalyzed by *homo*-PIL-x4 at 24 h with a conversion of 99% (Entry 1, Table 3).

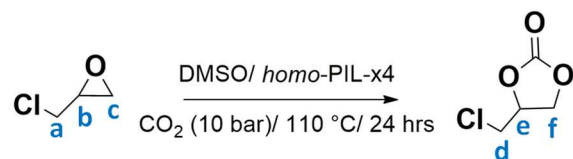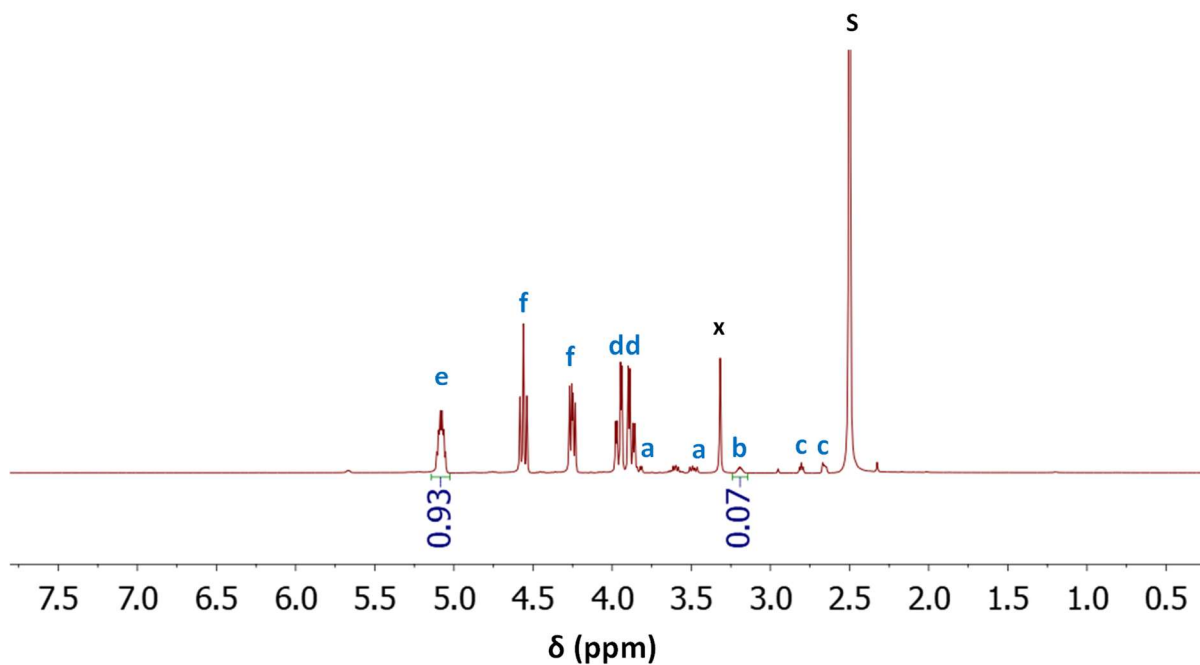

**Figure S25.** The  $^1\text{H}$  NMR spectrum of the epichlorohydrin carbonate in  $\text{DMSO-}d_6$ ; **S**: Solvent; **x**:  $\text{H}_2\text{O}$ , catalyzed by *homo*-PIL-x4 at 24 h with a conversion of 92 % (Entry 2, Table 3).

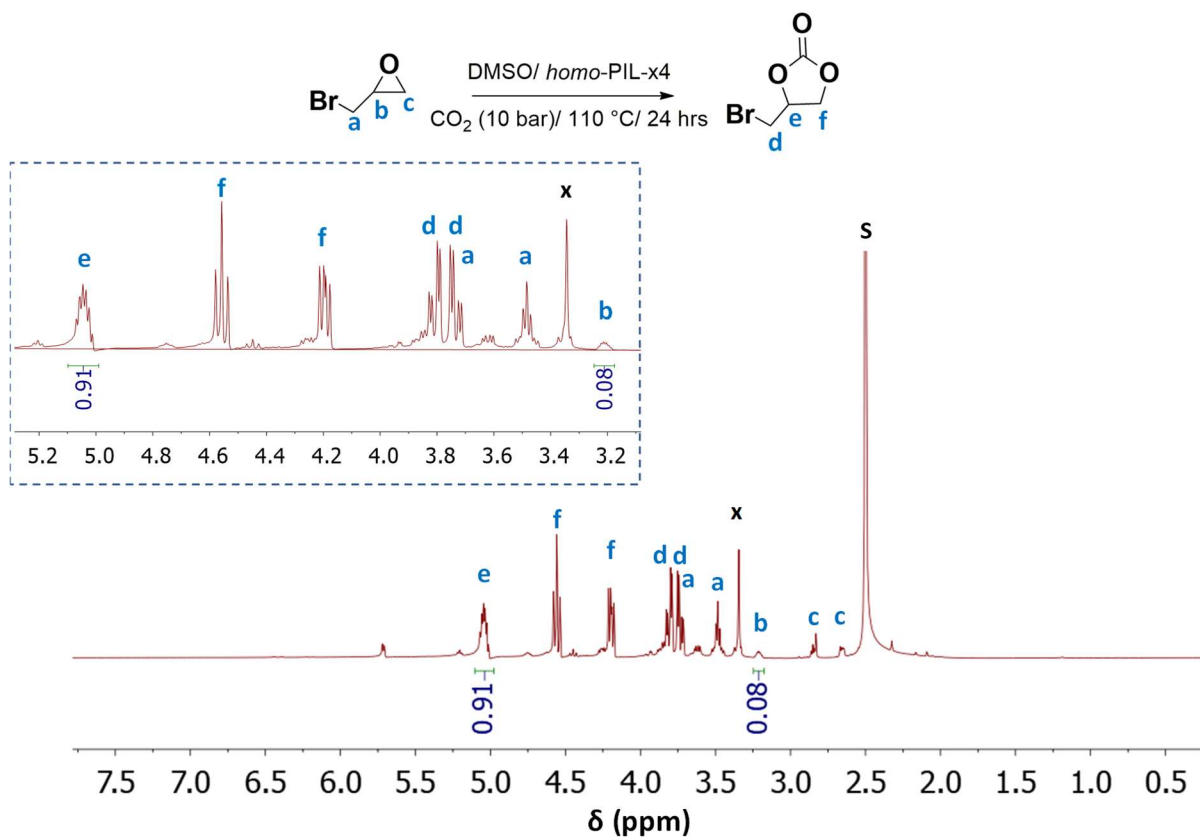

**Figure S26.** The  $^1\text{H}$  NMR spectrum of the epibromohydrin carbonate in  $\text{DMSO-}d_6$ ; **S**: Solvent; **x**:  $\text{H}_2\text{O}$  catalyzed by *homo*-PIL-x4 at  $P_{\text{CO}_2}$  (1 bar)/  $T$  (110  $^\circ\text{C}$ ) for 24 h with a conversion of 91% (Entry 3, Table 3).



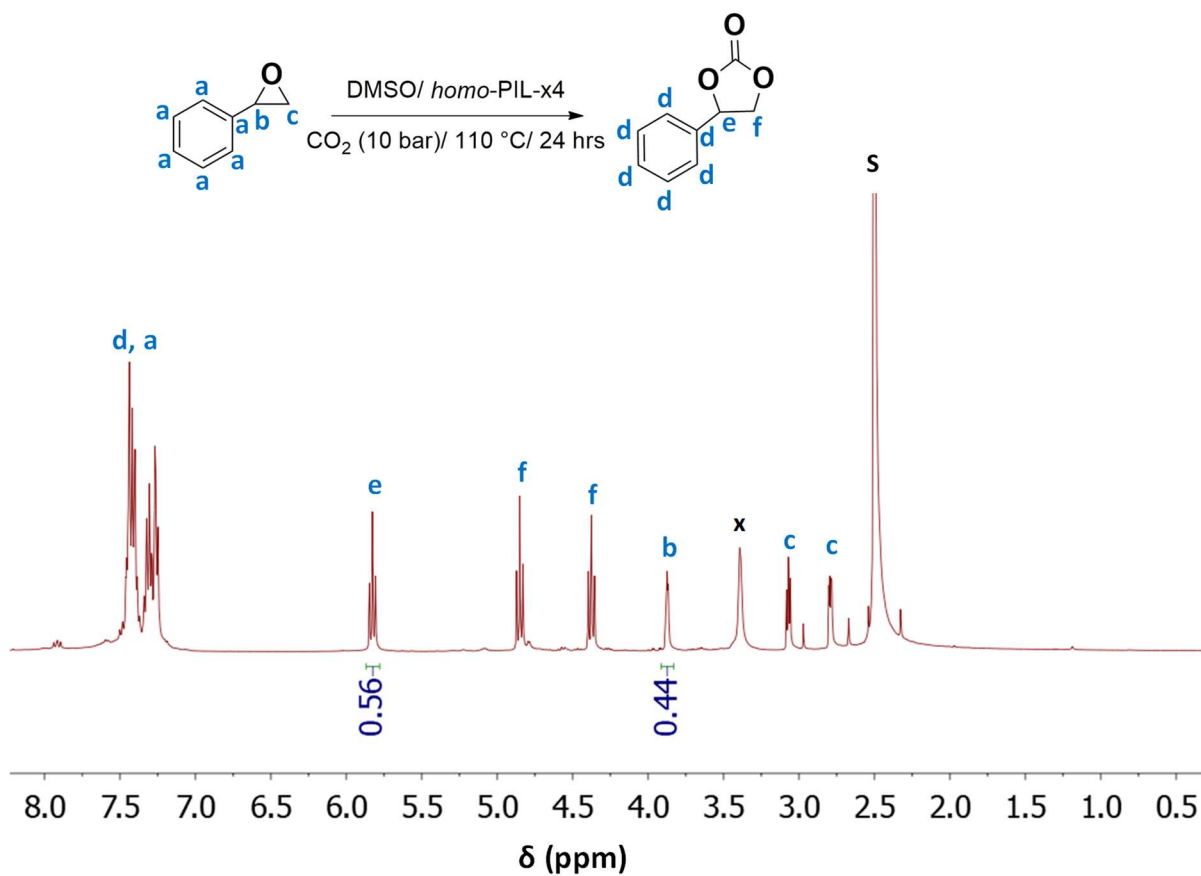

**Figure S27.** The  $^1\text{H}$  NMR spectrum of the styrene carbonate in  $\text{DMSO-}d_6$ ; S: Solvent; x:  $\text{H}_2\text{O}$  catalyzed by *homo*-PIL-x4 at 5h with a conversion 56% (Entry 4, Table 3).

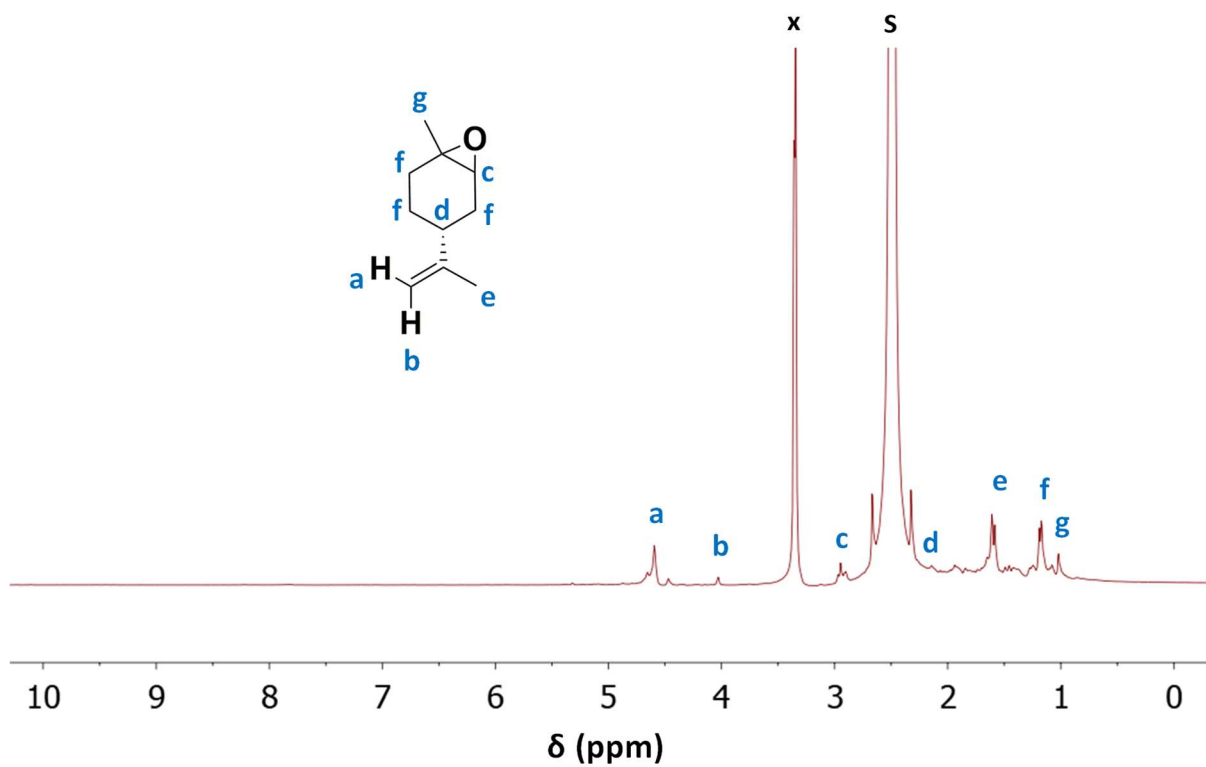

**Figure S28.** The  $^1\text{H}$  NMR spectrum of the crude reaction in  $\text{DMSO-}d_6$ ; S: Solvent; x:  $\text{H}_2\text{O}$ , catalyzed by *homo*-PIL-x4 at 24 h (Entry 5, Table 3).

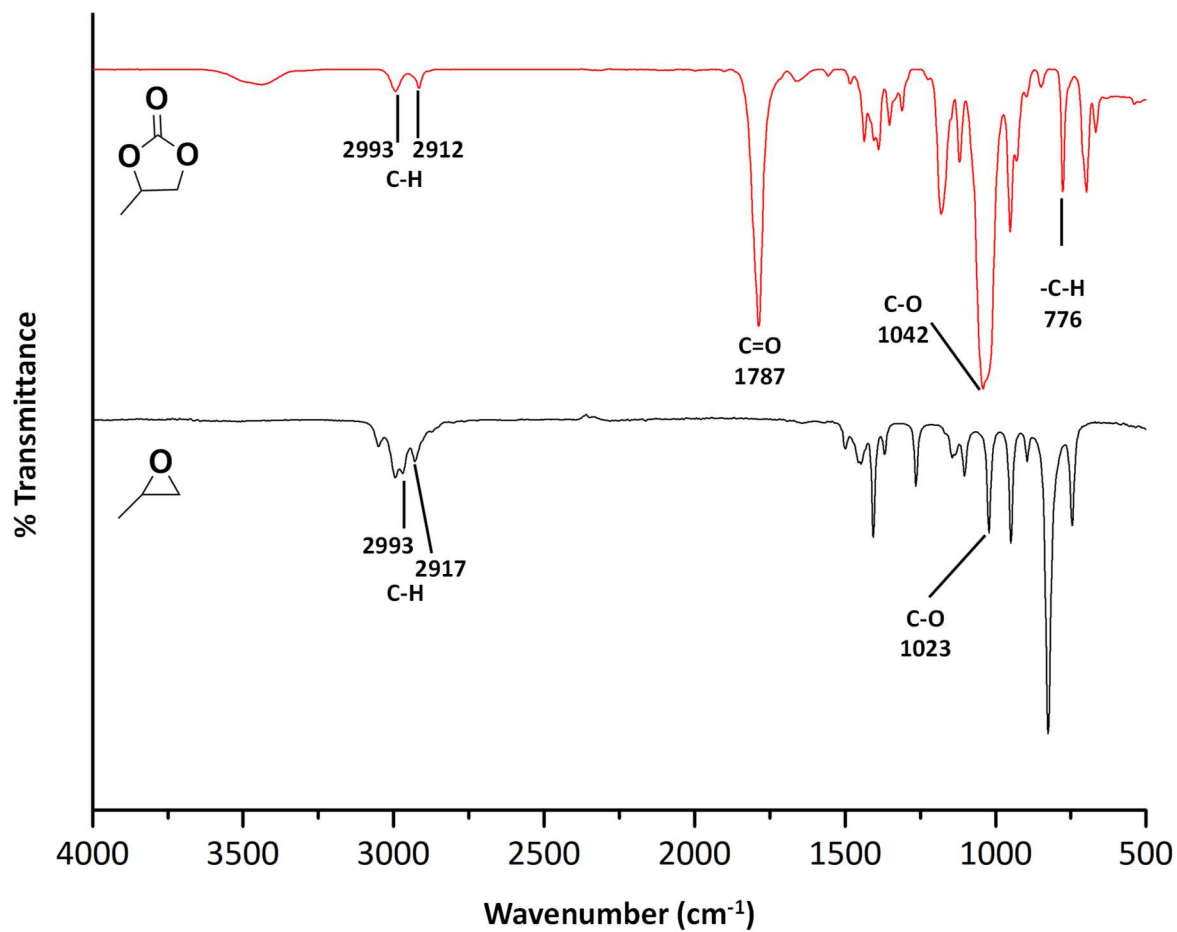

**Figure S29.** ATR-FTIR spectra of the propylene oxide (black trace) and propylene carbonate (red trace) (Entry 1, Table 3).

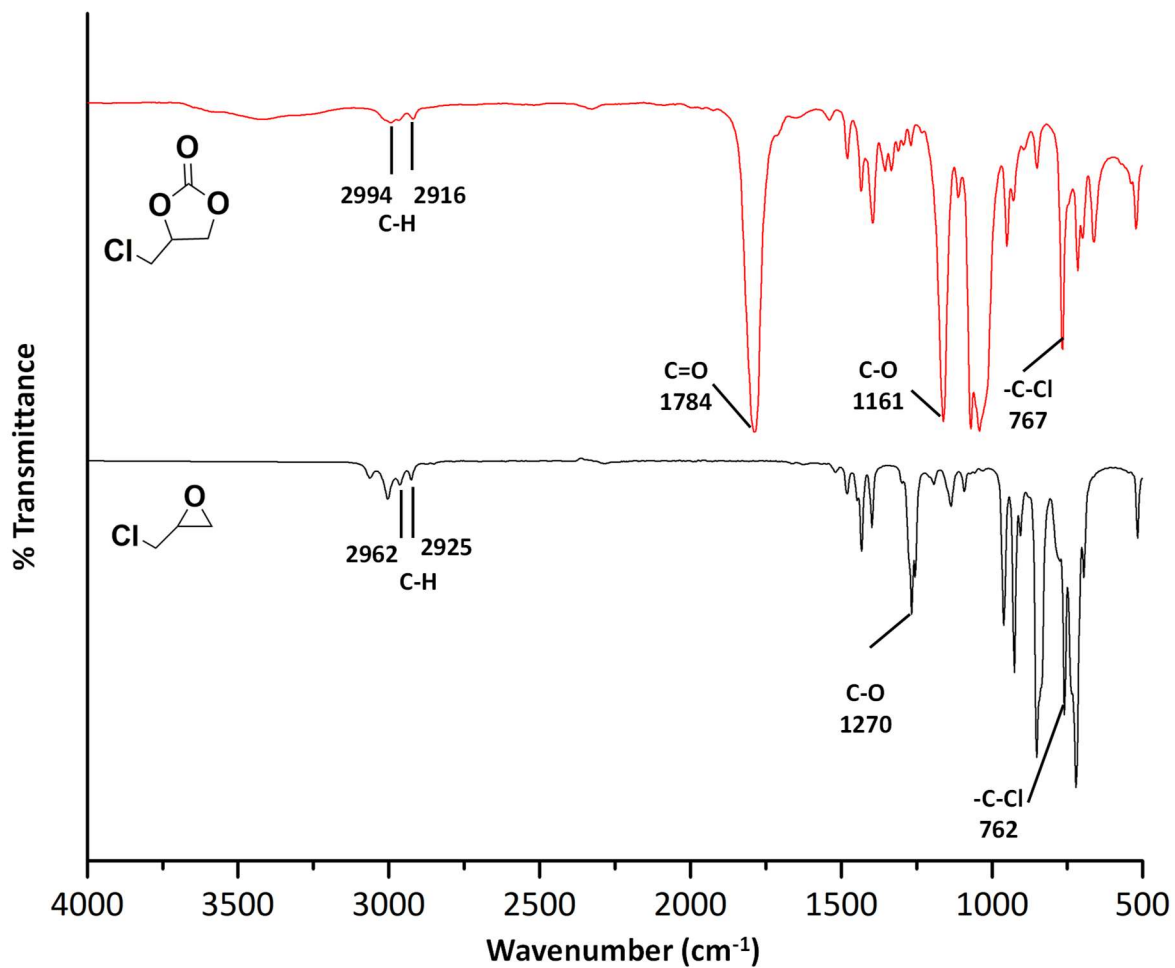

**Figure S30.** ATR-FTIR spectra of the epichlorohydrin (black trace) and epichlorohydrin carbonate (red trace) (Entry 2, Table 3).

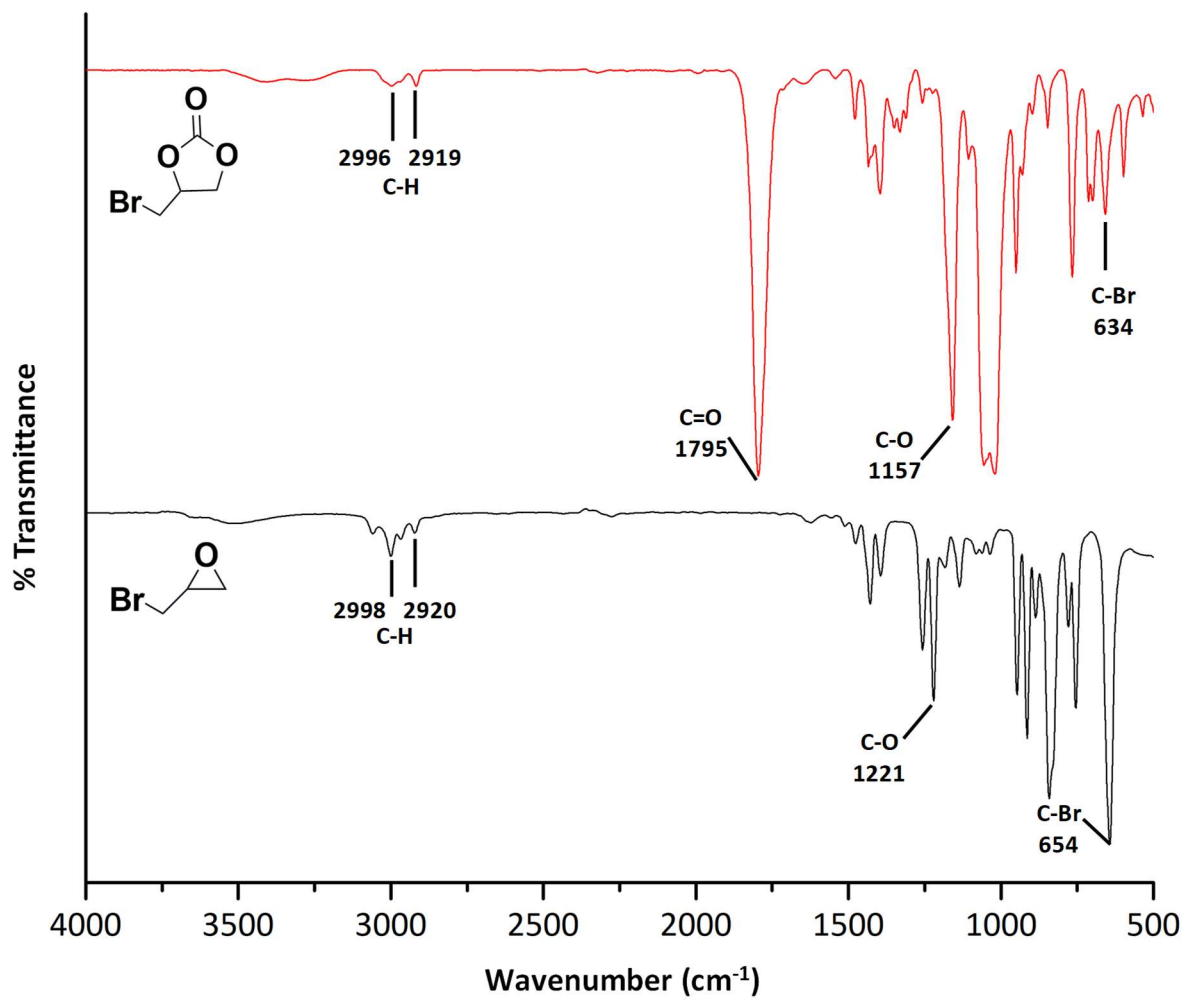

**Figure S31.** ATR-FTIR spectra of the epibromohydrin (black trace) and epibromohydrin carbonate (red trace) (Entry 3, Table 3).

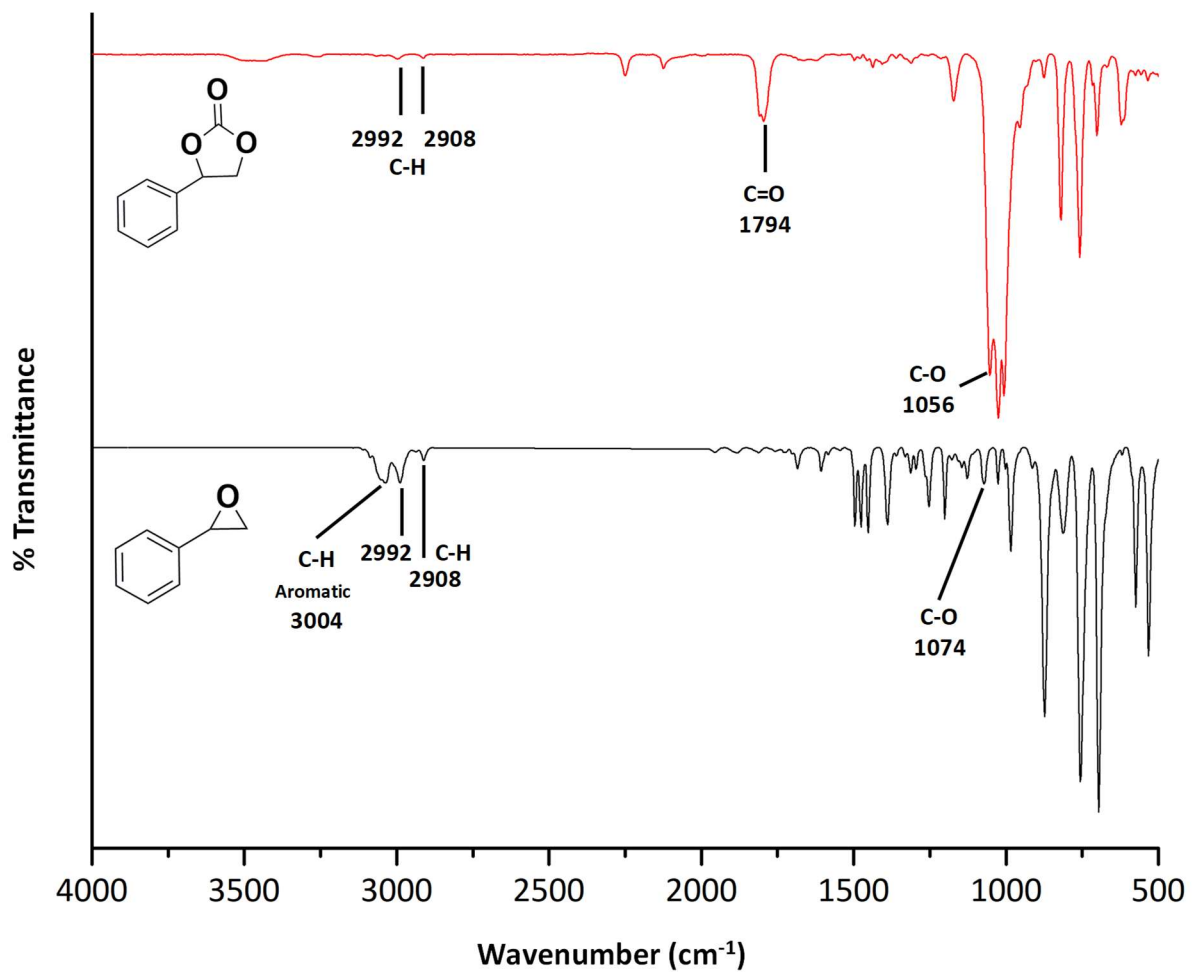

**Figure S32.** ATR-FTIR spectra of the styrene oxide (black trace) and styrene carbonate (red trace), (Entry 4, Table 3).

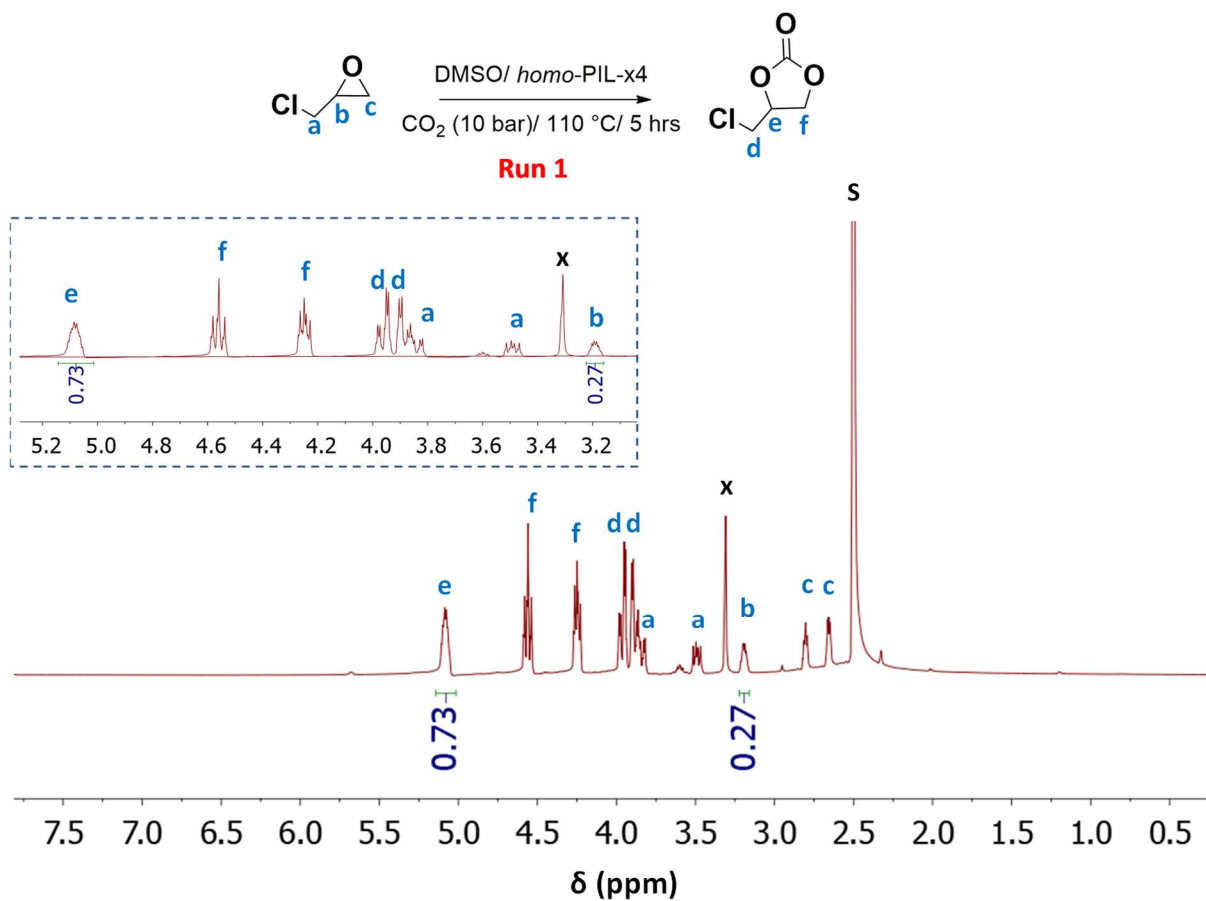

**Figure S33.** The  $^1\text{H}$  NMR spectrum of epichlorohydrin carbonate product in  $\text{DMSO-}d_6$ ; **S**: Solvent; **x**:  $\text{H}_2\text{O}$ , catalyzed by *homo*-PIL-x4 at 5 h with a conversion of 73%, first run.

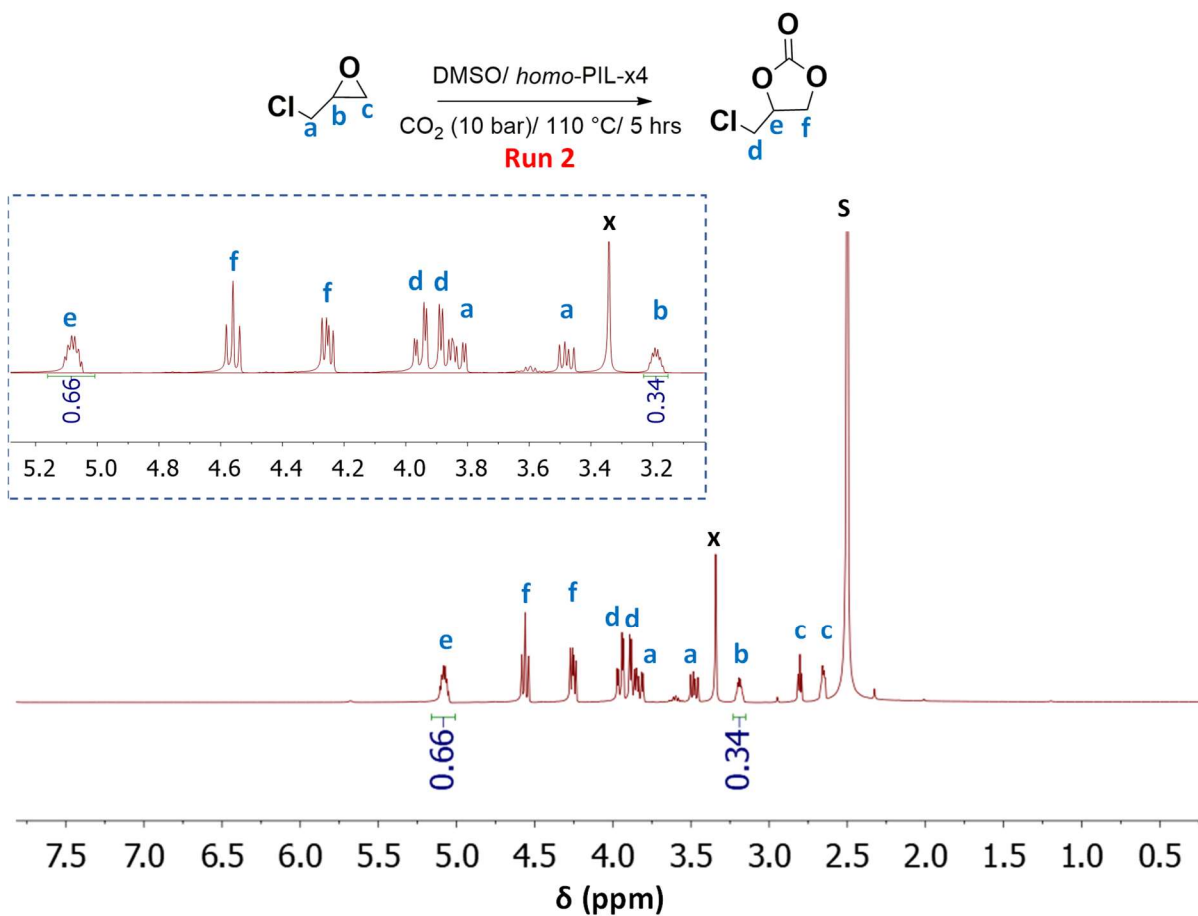

**Figure S34.** The <sup>1</sup>H NMR spectrum of epichlorohydrin carbonate product in DMSO-*d*<sub>6</sub>; S: Solvent; x: H<sub>2</sub>O, catalyzed by *homo*-PIL-x4 at 5 h with a conversion of 66%, second run.



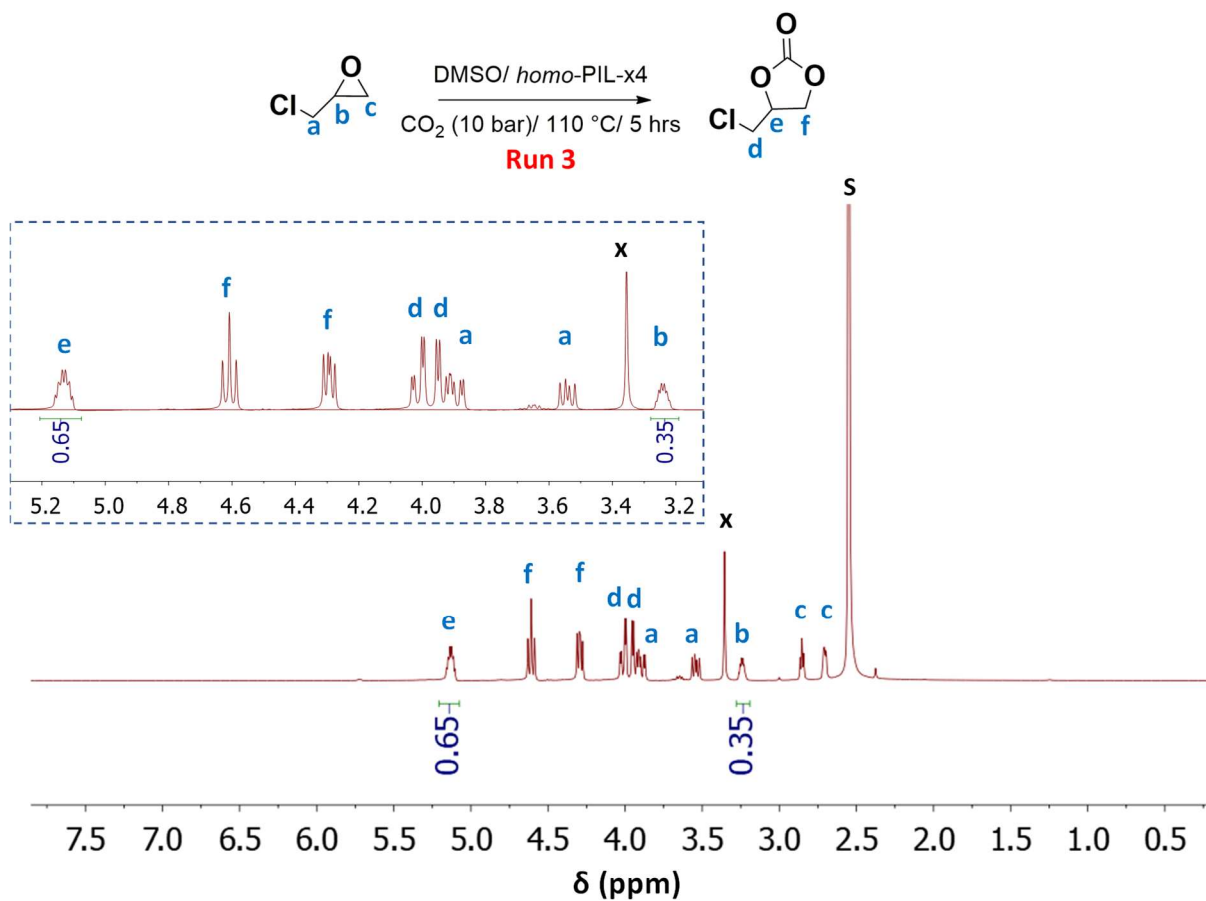

**Figure S35.** The  $^1\text{H}$  NMR spectrum of epichlorohydrin carbonate product in  $\text{DMSO-}d_6$ ; **S**: Solvent; **x**:  $\text{H}_2\text{O}$ , catalyzed by *homo*-PIL-x4 at 5 h with a conversion of 65%, third run.

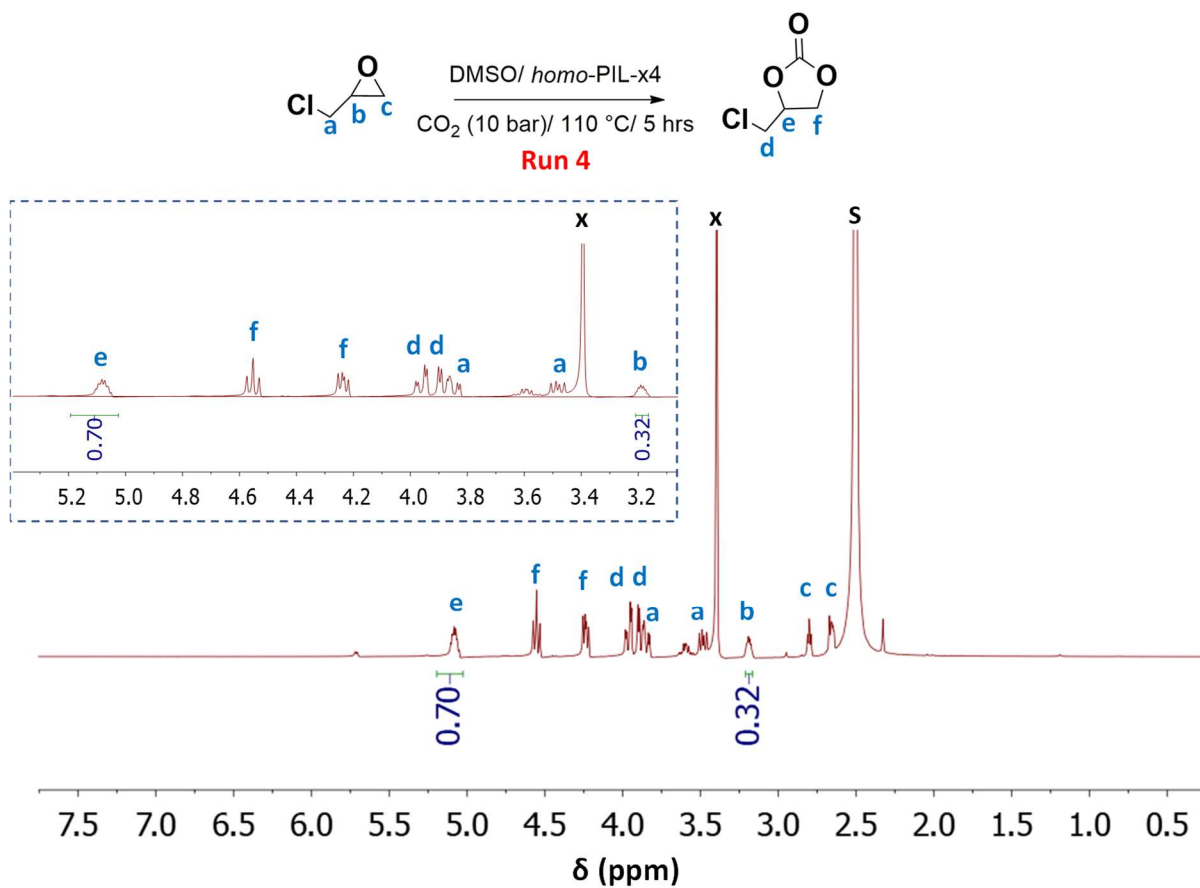

**Figure S36.** The  $^1\text{H}$  NMR spectrum of epichlorohydrin carbonate product in  $\text{DMSO-}d_6$ ; S: Solvent; x:  $\text{H}_2\text{O}$ , catalyzed by *homo*-PIL-x4 at 5 h with a conversion of 70%, fourth run.

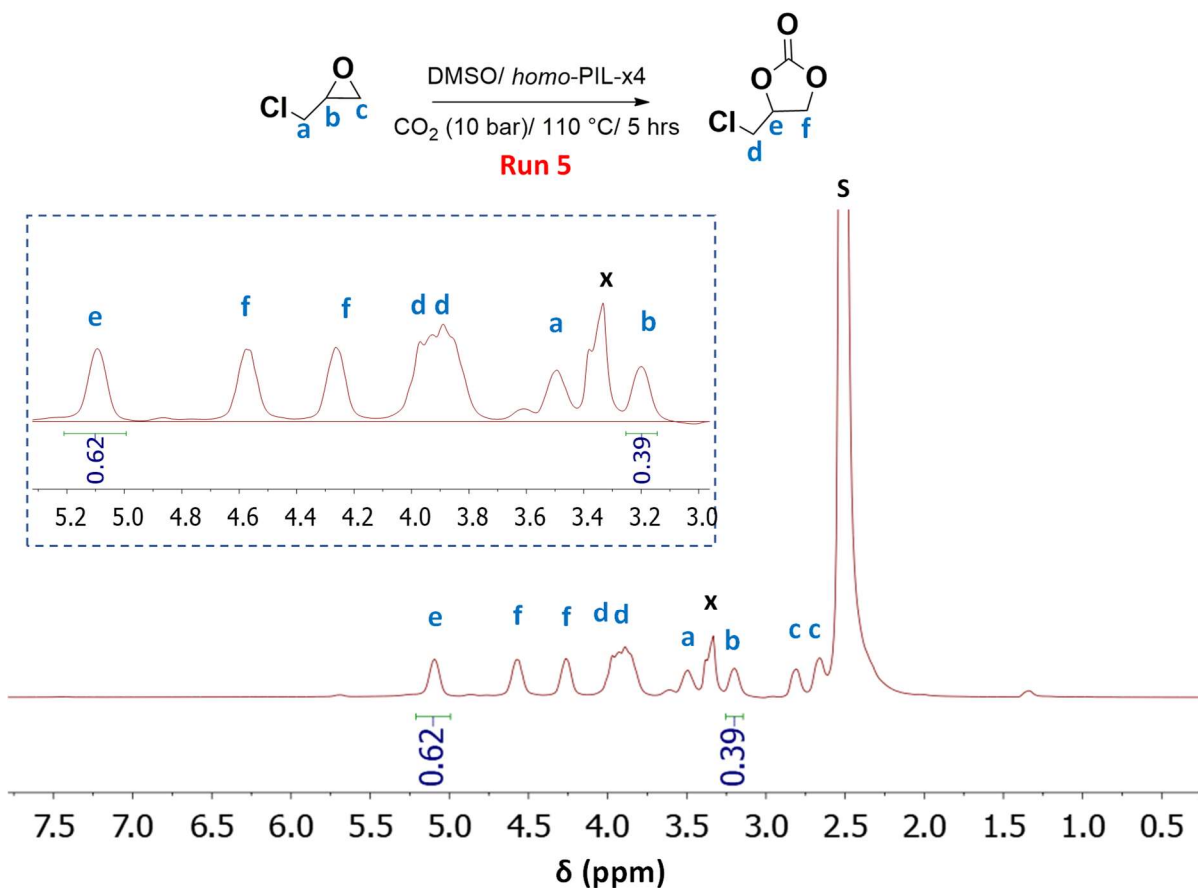

**Figure S37.** The  $^1\text{H}$  NMR spectrum of epichlorohydrin carbonate product in  $\text{DMSO}-d_6$ ; S: Solvent; x:  $\text{H}_2\text{O}$ , catalyzed by *homo*-PIL-x4 at 5 h with a conversion of 62%, fifth run.

## References

- 1 A. Wilke, J. Yuan, M. Antonietti and J. Weber, *ACS Macro Lett.*, 2012, **1**, 1028–1031.
- 2 X. Feng, C. Gao, Z. Guo, Y. Zhou and J. Wang, *RSC Adv.*, 2014, **4**, 23389–23395.
- 3 H. Ran, J. Wang, A. A. Abdeltawab, X. Chen, G. Yu and Y. Yu, *J. Energy Chem.*, 2017, **26**, 909–918.
- 4 M. A. Ziaee, Y. Tang, H. Zhong, D. Tian and R. Wang, *ACS Sustain. Chem. Eng.*, 2018, **7**, 2380–2387.
- 5 C. Cui, R. Sa, Z. Hong, H. Zhong and R. Wang, *ChemSusChem*, 2020, **13**, 180–187.
- 6 Y. Xie, J. Liang, Y. Fu, M. Huang, X. Xu, H. Wang, S. Tu and J. Li, *J. Mater. Chem. A*, 2018, **6**, 6660–6666.
- 7 J. Li, D. Jia, Z. Guo, Y. Liu, Y. Lyu, Y. Zhou and J. Wang, *Green Chem.*, 2017, **19**, 2675–2686.
- 8 N. Yu. Kuznetsov, R. M. Tikhov, I. A. Godovikov, V. N. Khrustalev and Yu. N. Bubnov, *Org. Biomol. Chem.*, 2016, **14**, 4283–4298.
- 9 E. I. Privalova, E. Karjalainen, M. Nurmi, P. Mäki-Arvela, K. Eränen, H. Tenhu, D. Yu. Murzin and J.-P. Mikkola, *ChemSusChem*, 2013, **6**, 1500–1509.
- 10 Q. Zhao, J. C. Wajert and J. L. Anderson, *Anal. Chem.*, 2010, **82**, 707–713.
- 11 P. Nellopalli, L. C. Tomé, K. Vijayakrishna and I. M. Marrucho, *Ind. Eng. Chem. Res.*, 2019, **58**, 2017–2026.

- 12 M. A. Ziaee, Y. Tang, H. Zhong, D. Tian and R. Wang, *ACS Sustain. Chem. Eng.*, 2019, **7**, 2380–2387.
- 13 P. Li, D. R. Paul and T.-S. Chung, *Green Chem.*, 2012, **14**, 1052–1063.
- 14 R. M. Silverstein, F. X. Webster, D. J. Kiemle and D. L. Bryce, *Spectrometric identification of organic compounds*, John Wiley and Sons: Hoboken, NJ, 2015
- 15 J. Hu, Y. Liu, Y. Jiao, S. Ji, R. Sun, P. Yuan, K. Zeng, X. Pu and G. Yang, *RSC Adv.*, 2015, **5**, 16199–16206.
- 16 N. Li, H. Wang, Q. Xiaosai and Y. Chen, *Mar. Drugs*, 2017, **15**, 223.
- 17 P. Marzbani, H. Resalati, A. Ghasemian and A. Shakeri, *Bioresources*, 2016, **11**, 8720–8738.
- 18 A. Abulikemu, G. Halász, A. Csámpai, Á. Gömöry and J. Rábai, *J. Fluor. Chem.*, 2004, **125**, 1143–1146.
- 19 R. D. McLachlan and R. A. Nyquist, *Spectrochim. Acta Part Mol. Spectrosc.*, 1968, **24**, 103–114.
- 20 Y. Xie, Z. Zhang, T. Jiang, J. He, B. Han, T. Wu and K. Ding, *Angew. Chem. Int. Ed.*, 2007, **46**, 7255.
- 21 S. Ghazali-Esfahani, H. Song, E. Păunescu, F. D. Bobbink, H. Liu, Z. Fei, G. Laurency, M. Bagherzadeh, N. Yan and P. J. Dyson, *Green Chem.*, 2013, **15**, 1584–1589.
- 22 T.-Y. Shi, J.-Q. Wang, J. Sun, M.-H. Wang, W.-G. Cheng and S.-J. Zhang, *RSC Adv.*, 2013, **3**, 3726–3732.
- 23 J. Li, D. Jia, Z. Guo, Y. Liu, Y. Lyu, Y. Zhou and J. Wang, *Green Chem.*, 2017, **19**, 2675–2686.
- 24 H. Zhong, J. Gao, R. Sa, S. Yang, Z. Wu and R. Wang, *ChemSusChem*, 2020, cssc.202001658.
- 25 C. Cui, R. Sa, Z. Hong, H. Zhong and R. Wang, *ChemSusChem*, 2020, **13**, 180–187.
- 26 C. Yang, Y. Chen, Y. Qu, J. Zhang and J. Sun, *Sustain. Energy Fuels*, 2021, **5**, 1026–1033.
- 27 D. Valverde, R. Porcar, P. Lozano, E. García-Verdugo and S. V. Luis, *ACS Sustain. Chem. Eng.*, 2021, **9**, 2309–2318.
